# Supplementary material
Source: PubMed Central journal article supplement (PMC4833072)
Supplement: supp_msv086_Menzel_et_al_Supplementary_Material_Merged.pdf [file supp_msv086_Menzel_et_al_Supplementary_Material_Merged.pdf]

|                                         |               |
|-----------------------------------------|---------------|
| <b>Supplementary Material - Content</b> | <b>Page 1</b> |
| Supplementary Material 1 – Methods      | Page 2        |
| Supplementary Table 1                   | Page 4        |
| Supplementary Table 2                   | page 5        |
| Supplementary Table 3                   | Page 14       |
| Supplementary Table 4                   | Page 24       |
| Supplementary Table 5                   | Page 28       |
| Supplementary Table 6                   | Page 30       |
| Supplementary Table 7                   | Page 31       |
| Supplementary Table 8                   | Page 32       |
| Supplementary Figure 1                  | Page 33       |
| Supplementary Figure 2                  | Page 34       |
| Supplementary Figure 3                  | Page 35       |
| Supplementary Figure 4                  | Page 36       |
| Supplementary Figure 5                  | Page 37       |
| Supplementary Figure 6                  | Page 38       |
| Supplementary Material 2 – SNP calling  | Page 39       |

## Supplementary Material 1

### A) Transcriptome assembly

The *A. lyrata* genome was indexed using Bowtie2 (version 2.0.0) (Langmead and Salzberg 2012):

```
bowtie2-build -f Araly1_assembly_scaffolds.fasta Araly
```

Now TopHat was run with default parameters and specifying the index of the *A. lyrata* genome and a corresponding gene model annotation file (x signifies the sample name):

```
tophat -p 8 -G Araly1_GeneModels_FilteredModels6.gff -o TopHat2 Araly  
x_1.fastq x_2.fastq
```

### B) Obtaining read counts

Read counts for all samples were obtained from the BAM files in the TopHat output which contain the read alignments. Since HTSeq requires SAM files as input, files needed to be converted and sorted first using SAMtools (version 0.1.18) (Li, et al. 2009):

```
samtools sort -n accepted_hits.bam hits.sorted  
samtools view -h -o hits.sorted.sam hits.sorted.bam
```

Then HTSeq was run with the following command to match read counts to the *Arabidopsis lyrata* genes:

```
python -m HTSeq.scripts.count -i name hits.sorted.sam Araly1_GeneMod  
els_FilteredModels6.gff > counts.txt -s no
```

### C) Obtaining differentially expressed genes

Analysis of differential expression was performed using the Bioconductor package DESeq. The read counts per gene were arranged in a table to fit the DESeq script and analysis was carried out according to the vignette with a FDR of 0.05:

```
CountTable <- read.table("ReadCounts.txt", header=TRUE, sep="\t", row.names=1)  
Design <- data.frame(row.names=colnames(CountTable), condition= c("Within",  
"Selfed", [...], "Within", "Selfed"))
```

```

conds ← factor(c(Within", "Selfed", [...], "Within", "Selfed"))
library("DESeq")
cds ← newCountDataSet(CountTable, conds)
cds ← estimateSizeFactors(cds)
sizeFactors(cds)
cds ← estimateVaraianceFunction(cds)
res ← nbinomTest(cds, "Within", "Selfed")
resSig ← res[res$padj<0.05, ]
write.table(resSig, file="results.txt")

```

#### D) Annotation of candidate genes

The candidate genes were annotated by running InterProScan, and thus, obtaining gene ontology terms, protein families and domains. Input was a protein fasta file of the candidates.

```

interproscan.sh -iprlookup -goterms -pa -f gff3,xml -t p -i
Candidates.fasta -T Temp -b Candidates_InterProScan

```

#### E) Example of input file for pathway visualisation with MapMan

| homolog_id | log2 fold Norway | flag N | log 2 fold Sweden | flag S |
|------------|------------------|--------|-------------------|--------|
| AT1G11300  | 2.110            | 1      | 1.529             | 1      |
| AT2G30750  | 2.780            | 1      | 2.709             | 1      |
| AT4G19810  | 4.222            | 1      | 2.323             | 1      |

#### References:

Langmead B, Salzberg SL. 2012. Fast gapped-read alignment with Bowtie 2. *Nat Methods* 9:357-359.

Li H, Handsaker B, Wysoker A, Fennell T, Ruan J, Homer N, Marth G, Abecasis G, Durbin R, Proc GPD. 2009. The Sequence Alignment/Map format and SAMtools. *Bioinformatics* 25:2078-2079.

**Supplementary Table 1: Total number of reads and mapping statistics using TopHat.** The upper table summarizes the results for the population Norway, and the lower table the results for the population Sweden. The proportion of properly paired reads and singletons to the *Arabidopsis lyrata* reference genome are based on the amount of mapped reads. "W" represents outcrossing and "S" selfing with each number being assigned to a different individual. The TopHat output was parsed using the SAMtools flagstat command.

|                           | <b>03W</b> | <b>03S</b> | <b>17W</b> | <b>17S</b> | <b>31W</b> | <b>31S</b> | <b>41W</b> | <b>41S</b> | <b>48W</b> | <b>48S</b> |
|---------------------------|------------|------------|------------|------------|------------|------------|------------|------------|------------|------------|
| Total Reads [M]           | 22.89      | 33.20      | 41.90      | 33.23      | 15.51      | 20.72      | 32.10      | 35.33      | 29.42      | 23.01      |
| Reads mapped [%]          | 81.6       | 84.3       | 84.9       | 84.8       | 92.1       | 88.5       | 86.4       | 82.2       | 86.6       | 84.0       |
| Properly paired reads [%] | 83.5       | 87.6       | 84.8       | 81.7       | 82.5       | 83.3       | 85.0       | 81.3       | 86.2       | 86.1       |
| Singletons [%]            | 11.1       | 9.8        | 10.1       | 11.2       | 10.9       | 10.5       | 9.5        | 12.1       | 9.0        | 9.9        |

|                           | <b>52W</b> | <b>52S</b> | <b>55W</b> | <b>55S</b> | <b>69W</b> | <b>69S</b> | <b>81W</b> | <b>81S</b> | <b>82W</b> | <b>82S</b> | <b>94W</b> | <b>94S</b> | <b>96W</b> | <b>96S</b> |
|---------------------------|------------|------------|------------|------------|------------|------------|------------|------------|------------|------------|------------|------------|------------|------------|
| Total reads [M]           | 8.58       | 5.27       | 4.08       | 3.86       | 31.47      | 9.30       | 12.01      | 28.07      | 29.34      | 30.34      | 25.21      | 29.70      | 23.88      | 27.83      |
| Reads mapped [%]          | 79.3       | 79.7       | 72.5       | 84.1       | 85.7       | 79.0       | 74.3       | 85.8       | 85.7       | 91.5       | 86.8       | 87.4       | 84.4       | 86.9       |
| Properly paired reads [%] | 80.5       | 64.1       | 69.6       | 57.7       | 82.4       | 70.4       | 79.8       | 83.1       | 81.4       | 81.3       | 80.9       | 77.5       | 68.2       | 71.2       |
| Singletons [%]            | 12.2       | 17.9       | 15.8       | 19.7       | 11.0       | 14.5       | 12.6       | 10.7       | 11.3       | 10.6       | 11.5       | 12.5       | 15.3       | 15.0       |

**Supplementary Table 2: Overview and annotation of genes that were significantly differentially expressed in both populations.** The genes were obtained by differential expression analysis using DESeq with the comparisons: Norway selfed vs. Norway outcrossed (within-Norway comparison) and Sweden selfed vs. Sweden outcrossed (within-Sweden comparison). The upper half of the table displays the genes differentially expressed in the same direction in the two populations, whereas the second half adds genes that were differentially in both populations but in different directions. The table shows the annotation as retrieved by performing InterProScan on the samples and public annotation as performed the Arabidopsis Information Resource (TAIR). The last column gives the log2 fold changes in expression in the selfed compared to the non-selfed for both populations.

| <b>Protein ID</b> | <b>InterProScan</b>                 | <b>TAIR Annotation</b>                                                                                                                                                                                                                                                         | <b>Reference</b>              | <b>Log2 Fold Change in Selfed</b>                        |
|-------------------|-------------------------------------|--------------------------------------------------------------------------------------------------------------------------------------------------------------------------------------------------------------------------------------------------------------------------------|-------------------------------|----------------------------------------------------------|
| 879372            | PAN-like domain                     | Apple-like; Bulb-type lectin domain; S-receptor-like serine/threonine-protein kinase; Serine/threonine-protein kinase, active site; PAN-2 domain; Protein kinase, catalytic domain; S-locus glycoprotein; Serine-threonine/tyrosine-protein kinase; Protein kinase-like domain | (Naithani, et al. 2007)       | Norway 2.11<br>Sweden 1.53                               |
| 320824            | Cytochrome P450                     | Cytochrome P450, E-class, group I; Cytochrome P450, conserved site; Cytochrome P450                                                                                                                                                                                            | (Schuler 2006)                | Norway 2.78<br>Sweden 2.71                               |
| 329582            | Glycosyl hydrolases family 18       | Chitinase II; Glycoside hydrolase, superfamily; Glycoside hydrolase, subgroup, catalytic core; Glycoside hydrolase, family 18, catalytic domain                                                                                                                                | (Kasprzewska 2003)            | Norway 4.22<br>Sweden 2.32                               |
| 330253            | Late embryogenesis abundant protein | Late embryogenesis abundant protein, LEA-14                                                                                                                                                                                                                                    | (Hundertmark and Hincha 2008) | Norway 5.24<br>Sweden 3.33                               |
| 338501            | Barwin family                       | Glycoside hydrolase, family 19, catalytic; Barwin; Barwin-related endoglucanase; Barwin, conserved site; Barwin-like endoglucanase                                                                                                                                             | (Svensson, et al. 1992)       | Norway 1.25<br>Sweden 7.51<br>Norway 3.10<br>Sweden 4.09 |

|        |                                          |                                                                                                                                                                         |                            |                              |
|--------|------------------------------------------|-------------------------------------------------------------------------------------------------------------------------------------------------------------------------|----------------------------|------------------------------|
| 346169 | Chitin recognition protein               | Chitin-binding, type 1, conserved site; Glycoside hydrolase, family 19; Lysozyme-like domain; Chitin-binding, type 1; Glycoside hydrolase, family 19, catalytic         | (Kasprzewska 2003)         | Norway 1.52<br>Sweden 1.92   |
| 348799 | Glycosyl hydrolase family 17             | Glycoside hydrolase, family 17; Glycoside hydrolase, subgroup, catalytic core; Glycoside hydrolase, superfamily                                                         | (Milinc 2008)              | Norway 2.25<br>Sweden 2.71   |
| 354029 | O-methyltransferase                      | O-methyltransferase, family 2; O-methyltransferase, COMT, imerization; Plant methyltransferase imerization; Winged helix-turn-helix transcription repressor DNA-binding | (Lam, et al. 2007)         | Norway 3.04<br>Sweden 4.32   |
| 472778 | Berberine and berberine like             | FAD-binding, type 2, subdomain 1; Berberine/berberine-like; FAD linked oxidase, N-terminal; FAD-linked oxidase, FAD-binding, subdomain 2; FAD-binding, type 2           | (Facchini, et al. 1996)    | Norway 1.73<br>Sweden 2.47   |
| 472780 | FAD binding domain                       | FAD-linked oxidase, FAD-binding, subdomain 2; FAD linked oxidase, N-terminal; Berberine/berberine-like; FAD-binding, type 2                                             | (Facchini, et al. 1996)    | Norway 5.88<br>Sweden 2.25   |
| 472781 | FAD binding domain                       | FAD-linked oxidase, FAD-binding, subdomain 2; FAD-binding, type 2, subdomain 1; FAD linked oxidase, N-terminal; FAD-binding, type 2; Berberine/berberine-like           | (Facchini, et al. 1996)    | Norway 3.46<br>Sweden 1.84   |
| 475633 | Phloem protein 2                         | Toll-Interleukin receptor                                                                                                                                               | (Kehr 2006)                | Norway -2.97<br>Sweden -3.87 |
| 475766 | SAM dependent carboxyl methyltransferase | SAM dependent carboxyl methyltransferase                                                                                                                                | (Ross, et al. 1999)        | Norway 3.09<br>Sweden 2.83   |
| 476458 | Trypsin and protease inhibitor           | Kunitz inhibitor ST1-like; Proteinase inhibitor 13, Kunitz legume                                                                                                       | (Jofuku and Goldberg 1989) | Norway 1.64<br>Sweden 1.13   |
| 477006 | VQ motif                                 | VQ                                                                                                                                                                      | (Cheng, et al. 2012)       | Norway 2.36<br>Sweden 1.36   |

|        |                                               |                                                                                                                                                                                                         |                                 |                             |
|--------|-----------------------------------------------|---------------------------------------------------------------------------------------------------------------------------------------------------------------------------------------------------------|---------------------------------|-----------------------------|
| 481863 | Glutathione S-transferase, C-terminal domain  | Glutathione S-transferase, N-terminal; Glutathione S-transferase, C-terminal-like; Glutathione S-transferase, C-terminal; Thioredoxin-like fold; Glutathione S-transferase/chloride channel, C-terminal | (Marrs 1996)                    | Norway 2.89<br>Sweden 1.64  |
| 481994 | Cytochrome P450                               | Cytochrome P450; Cytochrome P450, E-class, group I; Cytochrome P450, conserved site                                                                                                                     | (Schuler 2006)                  | Norway 6.56<br>Sweden 4.42  |
| 483400 | No apical meristem (NAM) protein              | No apical meristem (NAM) protein                                                                                                                                                                        | (Duval, et al. 2002)            | Norway 2.99<br>Sweden 2.02  |
| 483526 | Initiation factor 2 subunit family            | Initiation factor 2B-related                                                                                                                                                                            | (Pavitt 2005)                   | Norway 2.80<br>Sweden 1.90  |
| 485691 | UDP-glucuronosyl and UDP-glycosyl transferase | UDP-glucuronosyl/UDP-glycosyltransferase                                                                                                                                                                | (Ross, et al. 2001)             | Norway 3.53<br>Sweden 1.53  |
| 487053 | Glutathione S-transferase, C-terminal domain  | Glutathione S-transferase, N-terminal; Glutathione S-transferase/chloride channel, C-terminal; Thioredoxin-like fold; Glutathione S-transferase, C-terminal; Glutathione S-transferase, C-terminal-like | (Marrs 1996)                    | Norway 4.31<br>Sweden 1.49  |
| 488124 | WRKY DNA-binding domain                       | DNA-binding WRKY                                                                                                                                                                                        | (Cheng, et al. 2012)            | Norway 2.70<br>Sweden 1.67  |
| 492486 | Glycosyl hydrolases family 28                 | Pectin lyase fold; Glycoside hydrolase, family 28; Parallel beta-helix repeat; Pectin lyase fold/virulence factor                                                                                       | (Minic 2008)                    | Norway 2.12<br>Sweden 1.97  |
| 493878 | GDSL-like lipase/acylhydrolase                | Lipase, GDSL, active site; Lipase, GDSL                                                                                                                                                                 | (Ling 2008)                     | Norway 3.25<br>Sweden 2.09  |
| 494390 | Papain family cysteine protease               | Peptidase C1A, papain C-terminal; Peptidase, cysteine peptidase active site; Proteinase inhibitor I29, cathepsin propeptide; Peptidase C1A, papain                                                      | (Shindo and Van Der Hoorn 2008) | Norway 10.38<br>Sweden 2.60 |

|        |                                                        |                                                                                                                                                                                                                                                          |                           |                            |
|--------|--------------------------------------------------------|----------------------------------------------------------------------------------------------------------------------------------------------------------------------------------------------------------------------------------------------------------|---------------------------|----------------------------|
| 497196 | Short chain dehydrogenase                              | Short-chain dehydrogenase/reductase, conserved site; Short-chain dehydrogenase/reductase SDR; Glucose/ribitol dehydrogenase; NAD(P)-binding domain                                                                                                       | (Kavanagh, et al. 2008)   | Norway 2.97<br>Sweden 3.07 |
| 862882 | Jacalin-like lectin domain                             | Mannose-binding lectin                                                                                                                                                                                                                                   | (Barre, et al. 2001)      | Norway 3.21<br>Sweden 3.42 |
| 865114 | NmrA-like family                                       | NmrA-like; NAD(P)-binding domain                                                                                                                                                                                                                         | (Stammers, et al. 2001)   | Norway 2.80<br>Sweden 2.55 |
| 870854 | Chitinase class I                                      | Chitin-binding, type 1; Glycoside hydrolase, family 19, catalytic; Glycoside hydrolase, family 19; Chitin-binding, type 1, conserved site; Lysozyme-like domain                                                                                          | (Kasprzewska 2003)        | Norway 2.03<br>Sweden 2.55 |
| 871042 | Pectinesterase                                         | Pectin lyase fold/virulence factor; Carbohydrate-binding/sugar hydrolysis domain; Pectin lyase fold; Pectinesterase, active site; Pectinesterase inhibitor; Pectinesterase, catalytic                                                                    | (Micheli 2001)            | Norway 4.02<br>Sweden 0.72 |
| 873781 | Probable lipid transfer                                | Plant lipid transfer protein/Par allergen; Bifunctional inhibitor/plant lipid transfer protein/seed storage; Plant lipid transfer protein/hydrophobic protein, helical domain; Plant lipid transfer protein/seed storage/trypsin-alpha amylase inhibitor | (Kader 1996)              | Norway 5.15<br>Sweden 2.47 |
| 880659 | Brix domain                                            | Brix domain; Anticodon-binding                                                                                                                                                                                                                           | (Eisenhaber, et al. 2001) | Norway 1.95<br>Sweden -    |
| 886183 | Non-haem dioxygenase in morphine synthesis, N-terminal | Oxoglutarate/iron-dependent oxygenase                                                                                                                                                                                                                    | (Dunwell, et al. 2004)    | Norway 2.51<br>Sweden 1.98 |



|        |                                                      |                                                                                                                                                                                                                                                                                                                                                                       |                               |                                                            |
|--------|------------------------------------------------------|-----------------------------------------------------------------------------------------------------------------------------------------------------------------------------------------------------------------------------------------------------------------------------------------------------------------------------------------------------------------------|-------------------------------|------------------------------------------------------------|
| 889581 | Wall-associated receptor kinase galacturonan-binding | Epidermal growth factor-like, type 3; Serine-threonine/tyrosine-protein kinase; Protein kinase, catalytic domain; EGF calcium-binding; EGF-type aspartate/asparagine hydroxylation site; Concanavalin A-like lectin/glucanase, subgroup; EGF-like calcium-binding; EGF-like calcium-binding; conserved site; Epidermal growth factor-like; Protein kinase-like domain | (He, et al. 1999)             | Norway 3.31<br>Sweden 2.51                                 |
| 890879 | Subtilase family                                     | Peptidase S8/S53, subtilisin/kexin/sedolisin; Peptidase S8, subtilisin, His-active site; Protease-associated domain, PA; Peptidase S8, subtilisin, Ser-active site; Peptidase S8, subtilisin-related; Proteinase inhibitor I9, subtilisin propeptide                                                                                                                  | (Rautengarten, et al. 2005)   | Norway 4.02<br>Sweden 2.32                                 |
| 895371 | Thaumatin family                                     | Thaumatin, conserved site; Thaumatin, pathogenesis-related                                                                                                                                                                                                                                                                                                            | (Liu, et al. 2010)            | Norway 2.37<br>Sweden 2.83<br>Norway -4.81<br>Sweden -3.69 |
| 900481 |                                                      |                                                                                                                                                                                                                                                                                                                                                                       |                               |                                                            |
| 902535 | Cytochrome P450                                      | Cytochrome P450, E-class, group I; Cytochrome P450; Cytochrome P450, conserved site                                                                                                                                                                                                                                                                                   | (Schuler 2006)                | Norway 5.13<br>Sweden 2.01                                 |
| 906073 | Cytochrome P450                                      | Cytochrome P450, E-class, group I; Cytochrome P450; Cytochrome P450, conserved site                                                                                                                                                                                                                                                                                   | (Schuler 2006)                | Norway 3.57<br>Sweden 1.64                                 |
| 908138 | Protein phosphatase 2C                               | Protein phosphatase 2C-like; Protein phosphatase 2C; Protein phosphatase 2C, manganese/magnesium aspartate binding site                                                                                                                                                                                                                                               | (Rodriguez 1998)              | Norway -2.21<br>Sweden -1.29                               |
| 911976 | Legume lectin domain                                 | Protein kinase-like domain; Concanavalin A-like lectin/glucanase, subgroup; Serine/threonine-protein kinase, active site; Protein kinase, ATP binding site; Concanavalin A-like lectin/glucanase; Serine/threonine-protein kinase-like domain; Protein kinase, catalytic domain; Legume lectin, beta chain                                                            | (Bouwmeester and Govers 2009) | Norway 3.54<br>Sweden 2.21                                 |

|        |                                                     |                                                                                                                                                                                                                                                                              |                           |                             |
|--------|-----------------------------------------------------|------------------------------------------------------------------------------------------------------------------------------------------------------------------------------------------------------------------------------------------------------------------------------|---------------------------|-----------------------------|
| 472262 | Copper binding proteins, plastocyanin/azurin family | Blue (type 1) copper domain; Plastocyanin; Blue (type 1) copper protein; Cupredoxin                                                                                                                                                                                          | (De Rienzo, et al. 2000)  | Norway -1.77<br>Sweden 2.06 |
| 892250 | Glycosyl hydrolase family 1                         | Glycoside hydrolase, family 1; Glycoside hydrolase, superfamily; Glycoside hydrolase, subgroup, catalytic core                                                                                                                                                               | (Minic 2008)              | Norway -3.14<br>Sweden 2.28 |
| 489965 | Cathepsin propeptide inhibitor domain (I29)         | Peptidase C1A, papain C-terminal; Peptidase, cysteine peptidase active site; Peptidase C1A, papain; Proteinase inhibitor I29, cathepsin propeptide                                                                                                                           | (Guay, et al. 2000)       | Norway -2.27<br>Sweden 3.36 |
| 899321 | Chlorophyll A-B binding protein                     | Chlorophyll a/b binding protein domain; Chlorophyll A-B binding protein; Chlorophyll A-B binding protein, plant                                                                                                                                                              | (Leutwiler, et al. 1986)  | Norway -2.90<br>Sweden 1.91 |
| 474626 | Photosystem I psaG / psak                           | Photosystem I PsaG/Psak domain; Photosystem I PsaG/Psak protein; Photosystem I PsaG, plant; Photosystem I PsaG/Psak, plant                                                                                                                                                   | (Jensen, et al. 2007)     | Norway -2.07<br>Sweden 1.66 |
| 482403 | Chlorophyll A-B binding protein                     | Chlorophyll A-B binding protein; Chlorophyll A-B binding protein, plant; Chlorophyll a/b binding protein domain                                                                                                                                                              | (Leutwiler, et al. 1986)  | Norway -6.14<br>Sweden 6.09 |
| 491721 | Xyloglucan endo-transglycosylase (XET) C-terminus   | Glycoside hydrolase, family 16, active site; Xyloglucan endotrans-glycosylase/hydrolase; Beta-glucanase; Concanavalin A-like lectin/glucanase; Concanavalin A-like lectin/glucanase, subgroup; Xyloglucan endo-transglycosylase, C-terminal; Glycoside hydro-lase, family 16 | (Campbell and Braam 1999) | Norway -4.37<br>Sweden 1.49 |
| 899117 | Cytochrome P450                                     | Cytochrome P450, conserved site; Cytochrome P450, E-class, group I; Cytochrome P450                                                                                                                                                                                          | (Schuler 2006)            | Norway 2.05<br>Sweden -1.84 |
| 330654 | SAM dependent carboxyl methyltransferase            | SAM dependent carboxyl methyltransferase                                                                                                                                                                                                                                     | (Ross, et al. 1999)       | Norway -2.88<br>Sweden 1.44 |

|        |                                                         |                                                                                                                                                                                                                                                                            |                           |                             |
|--------|---------------------------------------------------------|----------------------------------------------------------------------------------------------------------------------------------------------------------------------------------------------------------------------------------------------------------------------------|---------------------------|-----------------------------|
| 480225 | Xyloglucan endo-transglycosylase (XET) C-terminus       | Glycoside hydrolase, family 16; Glycoside hydrolase, family 16, active site; Concanavalin A-like lectin/glucanase, subgroup; Concanavalin A-like lectin/glucanase; Beta-glucanase; Xyloglucan endo-transglycosylase, C-terminal; Xyloglucan endotransglucosylase/hydrolase | (Campbell and Braam 1999) | Norway -2.70<br>Sweden 1.86 |
| 473203 | Chlorophyll A-B binding protein                         | Chlorophyll A-B binding protein; Chlorophyll A-B binding protein, plant; Chlorophyll a/b binding protein domain                                                                                                                                                            | (Leutwiler, et al. 1986)  | Norway -2.62<br>Sweden 3.29 |
| 478197 | Chlorophyll A-B binding protein                         | Chlorophyll a/b binding protein domain; Chlorophyll A-B binding protein, plant; Chlorophyll A-B binding protein                                                                                                                                                            | (Leutwiler, et al. 1986)  | Norway -2.36<br>Sweden 1.94 |
| 472386 |                                                         |                                                                                                                                                                                                                                                                            |                           | Norway -2.02<br>Sweden 2.43 |
| 488319 | Carbonic anhydrase                                      | Carbonic anhydrase, prokaryotic-like, conserved site; Carbonic anhydrase                                                                                                                                                                                                   | (Moroney, et al. 2001)    | Norway -1.95<br>Sweden 1.75 |
| 495512 | Chlorophyll A-B binding protein                         | Chlorophyll A-B binding protein, plant; Chlorophyll A-B binding protein; Chlorophyll a/b binding protein domain                                                                                                                                                            | (Leutwiler, et al. 1986)  | Norway -2.11<br>Sweden 1.79 |
| 480276 |                                                         | Plant lipid transfer protein/seed storage/trypsin-alpha amylase inhibitor; Bifunctional inhibitor/plant lipid transfer protein/seed                                                                                                                                        | (Kader 1996)              | Norway -3.36<br>Sweden 0.99 |
| 908079 |                                                         | Plant lipid transfer protein/hydrophobic protein, helical domain; storage Heat shock protein DnaJ, cysteine-rich domain                                                                                                                                                    | (Miernyk 1999)            | Norway -2.20<br>Sweden 2.70 |
| 473204 | Chlorophyll A-B binding protein                         | Chlorophyll A-B binding protein, plant; Chlorophyll a/b binding protein domain; Chlorophyll A-B binding protein                                                                                                                                                            | (Leutwiler, et al. 1986)  | Norway -3.03<br>Sweden 4.52 |
| 496598 | Photosystem I reaction centre subunit N (PSAN or PSI-N) | Photosystem I PsaN, reaction centre subunit N                                                                                                                                                                                                                              | (Jensen, et al. 2007)     | Norway -1.94<br>Sweden 1.16 |

**References:**

- Barre A, Bourne Y, Van Damme EJM, Peumans WJ, Rouge P. 2001. Mannose-binding plant lectins: Different structural scaffolds for a common sugar-recognition process. *Biochimie* 83:645-651.
- Bouwmeester K, Govers F. 2009. Arabidopsis L-type lectin receptor kinases: phylogeny, classification, and expression profiles. *Journal of Experimental Botany* 60:4383-4396.
- Campbell P, Braam J. 1999. Xyloglucan endotransglycosylases: diversity of genes, enzymes and potential wall-modifying functions. *Trends in Plant Science* 4:361-366.
- Cheng Y, Zhou Y, Yang Y, Chi YJ, Zhou J, Chen JY, Wang F, Fan BF, Shi K, Zhou YH, et al. 2012. Structural and Functional Analysis of VQ Motif-Containing Proteins in Arabidopsis as Interacting Proteins of WRKY Transcription Factors. *Plant Physiology* 159:810-+.
- De Rienzo F, Gabboulline RR, Menziani MC, Wade RC. 2000. Blue copper proteins: A comparative analysis of their molecular interaction properties. *Protein Science* 9:1439-1454.
- Dunwell JM, Purvis A, Khuri S. 2004. Cupins: the most functionally diverse protein superfamily? *Phytochemistry* 65:7-17.
- Duval M, Hsieh TF, Kim SY, Thomas TL. 2002. Molecular characterization of ANNA1: a member of the Arabidopsis NAC domain superfamily. *Plant Mol Biol* 50:237-248.
- Eisenhaber F, Wechselsberger C, Kreil G. 2001. The Brix domain protein family - a key to the ribosomal biogenesis pathway? *Trends in Biochemical Sciences* 26:345-347.
- Facchini PJ, Penzes C, Johnson AG, Bull D. 1996. Molecular characterization of berberine bridge enzyme genes from opium poppy. *Plant Physiology* 112:1669-1677.
- Guay J, Fauqueyret JP, Ducret A, Percival MD, Mancini JA. 2000. Potency and selectivity of inhibition of cathepsin K, L and S by their respective propeptides. *European Journal of Biochemistry* 267:6311-6318.
- He ZH, Cheeseman I, He DZ, Kohorn BD. 1999. A cluster of five cell wall-associated receptor kinase genes, WAK1-5, are expressed in specific organs of Arabidopsis. *Plant Mol Biol* 39:1189-1196.
- Hundertmark M, Hincha DK. 2008. LEA (Late Embryogenesis Abundant) proteins and their encoding genes in Arabidopsis thaliana. *BMC Genomics* 9.
- Jensen PE, Bassi R, Boekema EJ, Dekker JP, Jansson S, Leister D, Robinson C, Scheller HV. 2007. Structure, function and regulation of plant photosystem I. *Biochimica Et Biophysica Acta-Bioenergetics* 1767:335-352.
- Jofuku KD, Goldberg RB. 1989. Kunitz Trypsin-Inhibitor Genes Are Differentially Expressed during the Soybean Life-Cycle and in Transformed Tobacco Plants. *Plant Cell* 1:1079-1093.
- Kader JC. 1996. Lipid-transfer proteins in plants. *Annual Review of Plant Physiology and Plant Molecular Biology* 47:627-654.
- Kasprowska A. 2003. Plant chitinases - Regulation and function. *Cellular & Molecular Biology Letters* 8:809-824.
- Kavanagh K, Journvall H, Persson B, Oppermann U. 2008. The SDR superfamily: functional and structural diversity within a family of metabolic and regulatory enzymes. *Cellular and Molecular Life Sciences* 65:3895-3906.
- Kehr J. 2006. Phloem sap proteins: their identities and potential roles in the interaction between plants and phloem-feeding insects. *Journal of Experimental Botany* 57:767-774.
- Lam KC, Ibrahim RK, Behdad B, Dayanandan S. 2007. Structure, function, and evolution of plant O-methyltransferases. *Genome* 50:1001-1013.

- Leutwiler LS, Meyerowitz EM, Tobin EM. 1986. Structure and expression of three light-harvesting chlorophyll a/b-binding protein genes in *Arabidopsis thaliana*. *Nucleic Acids Res* 14:4051-4064.
- Ling H. 2008. Sequence analysis of GDGL lipase gene family in *Arabidopsis thaliana*. *Pak J Biol Sci* 11:763-767.
- Liu JJ, Sturrock R, Ekramoddoullah AKM. 2010. The superfamily of thaumatin-like proteins: its origin, evolution, and expression towards biological function. *Plant Cell Rep* 29:419-436.
- Marrs KA. 1996. The functions and regulation of glutathione S-transferases in plants. *Annual Review of Plant Physiology and Plant Molecular Biology* 47:127-158.
- Micheli F. 2001. Pectin methyltransferases: cell wall enzymes with important roles in plant physiology. *Trends in Plant Science* 6:414-419.
- Miernyk JA. 1999. Protein folding in the plant cell. *Plant Physiology* 121:695-703.
- Mlinic Z. 2008. Physiological roles of plant glycoside hydrolases. *Planta* 227:723-740.
- Moroney JV, Bartlett SG, Samuelsson G. 2001. Carbonic anhydrases in plants and algae. *Plant Cell and Environment* 24:141-153.
- Naithani S, Chookajorn T, Ripoll DR, Nasrallah JB. 2007. Structural modules for receptor dimerization in the S-locus receptor kinase extracellular domain. *Proceedings of the National Academy of Sciences of the United States of America* 104:12211-12216.
- Pavitt GD. 2005. eIF2B, a mediator of general and gene-specific translational control. *Biochemical Society Transactions* 33:1487-1492.
- Rautengarten C, Steinhäuser D, Bussis D, Stintzi A, Schaller A, Kopka J, Altmann T. 2005. Inferring hypotheses on functional relationships of genes: Analysis of the *Arabidopsis thaliana* subtilase gene family. *PLoS Computational Biology* 1:297-312.
- Rodriguez PL. 1998. Protein phosphatase 2C (PP2C) function in higher plants. *Plant Mol Biol* 38:919-927.
- Ross J, Li Y, Lim EK, Bowles DJ. 2001. Higher plant glycosyltransferases. *Genome Biology* 2.
- Ross JR, Nam KH, D'Auria JC, Pichersky E. 1999. S-adenosyl-L-methionine : salicylic acid carboxyl methyltransferase, an enzyme involved in floral scent production and plant defense, represents a new class of plant methyltransferases. *Archives of Biochemistry and Biophysics* 367:9-16.
- Schuler MAD, H.; Bilgin, M.; Ali, S. . 2006. *Arabidopsis* cytochrome P450s through the looking glass: a window on plant biochemistry. *Phytochem Rev* 5:205-237.
- Shindo T, Van Der Hoorn RAL. 2008. Papain-like cysteine proteases: key players at molecular battlefields employed by both plants and their invaders. *Molecular Plant Pathology* 9:119-125.
- Stammers DK, Ren J, Leslie K, Nichols CE, Lamb HK, Cocklin S, Dodds A, Hawkins AR. 2001. The structure of the negative transcriptional regulator NmrA reveals a structural superfamily which includes the short-chain dehydrogenase/reductases. *Embo Journal* 20:6619-6626.
- Svensson B, Svendsen I, Højrup P, Roepstorff P, Ludvigsen S, Poulsen FM. 1992. Primary Structure of Barwin - a Barley Seed Protein Closely Related to the C-Terminal Domain of Proteins Encoded by Wound-Induced Plant Genes. *Biochemistry* 31:8767-8770.

**Supplementary Table 3: Overview and annotation of genes differential expressed only in population.** Genes were obtained by differential expression analysis using DESeq by comparing vs. Norway outcrossed and by excluding the genes that were differentially expressed in both (Supplementary Table 2). The table shows the annotation as retrieved by performing InterPro on the protein samples. The last column gives the log<sub>2</sub> fold changes in expression in the selfed compared to the outcrossed population.

| <b>Protein ID</b> | <b>InterProScan</b>                                   | <b>Log<sub>2</sub> Fold Change</b> |
|-------------------|-------------------------------------------------------|------------------------------------|
| 311814            | 50S ribosome-binding GTPase                           | 1.88                               |
| 312360            | Protein of unknown function (DUF1262)                 | 2.61                               |
| 312409            | Xyloglucan fucosyltransferase                         | 1.61                               |
| 312603            | Calcium-binding EGF domain                            | 1.76                               |
| 312863            | Flavin-binding monooxygenase-like                     | 3.74                               |
| 313816            | POT family                                            | 1.70                               |
| 313855            | Dimerisation domain                                   | 3.48                               |
| 315131            | Peptidase C13 family                                  | 1.91                               |
| 315221            | Mlo family                                            | 1.62                               |
| 317500            | Glycosyl hydrolase family 14                          | 4.16                               |
| 318019            | Chitin recognition protein                            | 3.83                               |
| 318682            | TLC domain                                            | 2.10                               |
| 319239            | MatE                                                  | 2.44                               |
| 319280            | Calponin homology (CH) domain                         | 2.16                               |
| 319814            | Rare lipoprotein A (RlpA)-like double-psi beta-barrel | 2.43                               |
| 321443            |                                                       | 2.70                               |
| 321760            | WRKY DNA -binding domain                              | 2.01                               |
| 322090            | Domain of unknown function (DUF4409)                  | 2.36                               |
| 322563            | F-box domain                                          | 2.40                               |
| 322779            | Protein of unknown function (DUF707)                  | 2.23                               |
| 323821            | Calcineurin-like phosphoesterase                      | 2.88                               |
| 324269            | Peptidase family S41                                  | 2.09                               |
| 326599            | HMGL-like                                             | -3.65                              |
| 327109            | Peroxidase                                            | 3.15                               |
| 327678            | Ion transport protein                                 | 1.60                               |
| 327935            | Multicopper oxidase                                   | 2.13                               |
| 328029            | Cytochrome P450                                       | 2.53                               |
| 329503            | Helix-loop-helix DNA-binding domain                   | -2.18                              |
| 329563            | VQ motif                                              | 2.19                               |
| 329840            | Terpene synthase family, metal binding domain         | 3.03                               |
| 329886            | Glycosyl hydrolases family 17                         | 3.52                               |
| 330043            | Chlorophyll A-B binding protein                       | 3.11                               |
| 330113            | 56kDa selenium binding protein (SBP56)                | -1.83                              |
| 331046            | Potato inhibitor I family                             | 6.02                               |
| 331197            | Protein kinase domain                                 | 1.52                               |
| 331608            | Cytochrome P450                                       | 4.66                               |
| 332024            | Cytochrome P450                                       | 3.22                               |
| 332328            | Major Facilitator Superfamily                         | 2.41                               |
| 333079            |                                                       | 2.51                               |
| 334097            | Eukaryotic-type carbonic anhydrase                    | 4.32                               |

|        |                                                                    |       |
|--------|--------------------------------------------------------------------|-------|
| 335144 | WRKY DNA -binding domain                                           | 2.51  |
| 335552 | Pathogenesis-related protein Bet v I family                        | 2.88  |
| 336359 | Zinc finger, C3HC4 type (RING finger)                              | 2.53  |
| 337274 | Eukaryotic translation initiation factor eIF2A                     |       |
| 337410 |                                                                    | 2.39  |
| 338258 | Terpene synthase, N-terminal domain                                | 3.15  |
| 339216 | WRKY DNA -binding domain                                           | 1.76  |
| 339498 | CCAAT-binding transcription factor (CBF-B/NF-YA) subunit B         | 2.78  |
| 339683 | GNS1/SUR4 family                                                   | 2.66  |
| 342045 |                                                                    | 3.09  |
| 343972 | Cytochrome P450                                                    | 1.82  |
| 344701 | Cation efflux family                                               | 2.70  |
| 346891 | GDSL-like Lipase/Acylhydrolase                                     | 2.52  |
| 347509 | Leucine rich repeat N-terminal domain                              | -3.11 |
| 350231 | Annexin                                                            | -3.12 |
| 352125 | 2OG-Fe(II) oxygenase superfamily                                   | 1.93  |
| 352273 | Staygreen protein                                                  | 2.58  |
| 353011 | Protein kinase domain                                              | 2.03  |
| 353102 | Cytochrome P450                                                    | 1.89  |
| 353319 | Arabidopsis phospholipase-like protein (PEARLI 4)                  | 2.73  |
| 353505 | Alanine dehydrogenase/PNT, N-terminal domain                       | 2.83  |
| 353547 | Retinal pigment epithelial membrane protein                        | 2.93  |
| 354767 | ABC-2 type transporter                                             | -2.63 |
| 355259 |                                                                    | 1.68  |
| 359589 | Domain of unknown function (DUF239)                                | 2.14  |
| 470192 | Cellulase (glycosyl hydrolase family 5)                            | 3.14  |
| 470207 | Polyketide cyclase / dehydrase and lipid transport                 | 4.29  |
| 470282 | ANTH domain                                                        | 2.28  |
| 470382 | HAD superfamily, subfamily IIIB (Acid phosphatase)                 | -3.23 |
| 470440 | Aldehyde oxidase and xanthine dehydrogenase, a/b hammerhead domain | 3.69  |
| 470785 | Pentatricopeptide repeat domain                                    | 2.32  |
| 470930 | Beta-eliminating lyase                                             | 2.58  |
| 470959 | Copine                                                             | 3.64  |
| 471013 | Nicotianamine synthase protein                                     | 4.42  |
| 471117 | Putative serine esterase (DUF676)                                  | 3.50  |
| 471294 | Pyridoxal-phosphate dependent enzyme                               | 2.30  |
| 471343 | Stigma-specific protein, Stig1                                     | 2.57  |
| 471443 | Glyceraldehyde 3-phosphate dehydrogenase, C-terminal domain        | -1.83 |
| 471490 | Regulator of Vps4 activity in the MVB pathway                      | 1.64  |
| 471526 | Methyladenine glycosylase                                          | 2.03  |
| 471558 | Protein of unknown function (DUF1336)                              | 2.69  |
| 471868 | NADH(P)-binding                                                    | -1.93 |
| 471969 | TIR domain                                                         | 1.07  |
| 472077 | Myb-like DNA-binding domain                                        | 1.98  |
| 472226 | Tubulin C-terminal domain-2012                                     | -1.86 |

|        |                                                               |       |
|--------|---------------------------------------------------------------|-------|
| 472361 | Protein tyrosine kinase                                       | 2.55  |
| 472375 |                                                               | 1.96  |
| 472635 | Alcohol dehydrogenase GroES-like domain                       | -1.91 |
| 473139 |                                                               | 1.94  |
| 473529 | beta-Glucocerebrosidase 2 N terminal                          | 1.94  |
| 473561 | Allinase                                                      | 2.23  |
| 473665 |                                                               | 2.49  |
| 474819 | Glycosyl transferase family 8                                 | 2.64  |
| 474884 | WD domain, G-beta repeat                                      | 1.75  |
| 475045 | AP2 domain                                                    | -1.45 |
| 475178 | S-locus glycoprotein family                                   | 2.18  |
| 475262 | Aldo/keto reductase family                                    | 2.77  |
| 475434 |                                                               | 2.42  |
| 475462 | Bromodomain                                                   | 8.24  |
| 475479 |                                                               | -2.11 |
| 475808 | Cytochrome P450                                               | 2.43  |
| 475878 | Photosystem II protein Y (PsbY)                               | -1.70 |
| 475879 | Pectate lyase                                                 | -2.49 |
| 475889 | Fe-S metabolism associated domain                             | 2.56  |
| 476004 |                                                               | 4.91  |
| 476141 | Matrixin                                                      | 2.64  |
| 476150 |                                                               | -2.75 |
| 476393 | Cupin                                                         | -3.01 |
| 476550 | Trypsin and protease inhibitor                                | 3.34  |
| 476582 | Pyridine nucleotide-disulphide oxidoreductase                 | -2.49 |
| 476608 | chorismate binding enzyme                                     | 2.19  |
| 476695 | FAD binding domain                                            | 2.16  |
| 476696 | ATP-dependent protease La (LON) domain                        | -1.98 |
| 476725 | Tubulin C-terminal domain                                     | -1.87 |
| 477377 | Homeobox associated leucine zipper                            | 2.55  |
| 477682 | TIR domain                                                    | 1.71  |
| 477692 | Trypsin and protease inhibitor                                | 6.31  |
| 477741 | Chitin recognition protein                                    | 2.85  |
| 477857 | Leucine rich repeat N-terminal domain                         | 1.53  |
| 477862 | CCAAT-binding transcription factor (CBF-B/NF-YA) subunit B    | 1.79  |
| 478210 | Glycosyltransferase sugar-binding region containing DXD motif | 2.86  |
| 478260 | Pectinacetylerase                                             | 4.76  |
| 478341 | Calcineurin-like phosphoesterase                              | 2.15  |
| 478362 | Protein of unknown function (DUF563)                          | 4.61  |
| 478998 |                                                               | 1.57  |
| 479069 | Asparaginase                                                  | 3.19  |
| 479116 | Legume lectin domain                                          | 4.48  |
| 479421 |                                                               | -2.54 |
| 479778 | Probable lipid transfer                                       | 4.14  |
| 479826 | Domain of unknown function (DUF3475)                          | 2.00  |



|        |                                                                      |       |
|--------|----------------------------------------------------------------------|-------|
| 479837 | AP2 domain                                                           | 6.52  |
| 479864 | MatE                                                                 | 4.06  |
| 480090 |                                                                      | 1.55  |
| 480324 | Aminotransferase class I and II                                      | 2.55  |
| 480389 | FAE1/Type III polyketide synthase-like protein                       | -1.79 |
| 480406 | Xyloglucan fucosyltransferase                                        | 2.29  |
| 481137 | Helix-loop-helix DNA-binding domain                                  | 2.58  |
| 481138 | Helix-loop-helix DNA-binding domain                                  | 1.95  |
| 481168 | Serine carboxypeptidase                                              | -1.89 |
| 481829 | Ligand-gated ion channel                                             | 0.69  |
| 481887 | UDP-glucuronosyl and UDP-glucosyl transferase                        | 1.69  |
| 482040 | PMR5 N terminal Domain                                               | 2.81  |
| 482050 | AP2 domain                                                           | 1.90  |
| 482294 | No apical meristem (NAM) protein                                     | 2.07  |
| 482542 | Heavy-metal-associated domain                                        | 3.88  |
| 482568 | Late embryogenesis abundant protein                                  | 2.42  |
| 482676 | Heavy-metal-associated domain                                        | 2.08  |
| 482736 | C2H2-type zinc finger                                                | 2.85  |
| 482737 | Endonuclease/Exonuclease/phosphatase family                          | 3.12  |
| 482891 |                                                                      | 1.64  |
| 483093 |                                                                      | 2.17  |
| 483126 | Response regulator receiver domain                                   | 3.69  |
| 483330 | Basic region leucine zipper                                          | -2.55 |
| 483469 | Chitin recognition protein                                           | 3.76  |
| 483470 | Chitin recognition protein                                           | 4.79  |
| 483607 |                                                                      | 4.93  |
| 483654 | Protease inhibitor/seed storage/LTP family                           | -4.64 |
| 483714 | C2 domain                                                            | 2.78  |
| 483895 | Myb-like DNA-binding domain                                          | 2.43  |
| 483936 | Pectinesterase                                                       | 3.38  |
| 484123 | Pyridoxal-dependent decarboxylase conserved domain                   | 3.27  |
| 484262 | Ureide permease                                                      | 1.78  |
| 484297 |                                                                      | 5.87  |
| 484318 | CDP-alcohol phosphatidyltransferase                                  | 2.76  |
| 484387 | Cytochrome P450                                                      | 6.19  |
| 484388 | Cytochrome P450                                                      | 2.00  |
| 484460 | Alpha/beta hydrolase family                                          | 2.10  |
| 484885 | SAM dependent carboxyl methyltransferase                             | 2.40  |
| 484965 | Protein tyrosine kinase                                              | 2.34  |
| 485103 | Plant invertase/pectin methylesterase inhibitor                      | -2.72 |
| 485205 | Cleavage site for pathogenic type III effector avirulence factor Avr | 2.38  |
| 485216 | Glycosyl hydrolases family 16                                        | 3.19  |
| 485452 | Alpha/beta hydrolase family                                          | 2.42  |
| 485496 | Strictosidine synthase                                               | 1.72  |
| 486390 | Pirin C-terminal cupin domain                                        | -1.75 |

|        |                                                            |       |
|--------|------------------------------------------------------------|-------|
| 486477 | Glycosyl hydrolase family 1                                | 3.64  |
| 486479 | Glycosyl hydrolase family 1                                | 1.99  |
| 486481 | Glycosyl hydrolase family 1                                | 3.07  |
| 486484 | Ring finger domain                                         | 1.78  |
| 486698 |                                                            | 5.51  |
| 486718 | ABC transporter                                            | 2.64  |
| 486733 | HCO <sub>3</sub> <sup>-</sup> transporter family           | 1.57  |
| 486816 | NADH(P)-binding                                            | -2.21 |
| 486913 | Protein of unknown function, DUF538                        | 3.14  |
| 487073 | Alpha/beta hydrolase family                                | 1.73  |
| 487282 | Nicotianamine synthase protein                             | -4.04 |
| 487575 | Glutamate/Leucine/Phenylalanine/Valine dehydrogenase       | 2.46  |
| 487602 | No apical meristem (NAM) protein                           | 2.89  |
| 487785 | lactate/malate dehydrogenase, alpha/beta C-terminal domain | -1.86 |
| 487844 | Myo-inositol-1-phosphate synthase                          | -2.39 |
| 487885 | Protein kinase domain                                      | 2.79  |
| 488048 |                                                            | -2.18 |
| 488135 | Domain of unknown function (DUF2828)                       | 1.74  |
| 488150 | GH3 auxin-responsive promoter                              | 2.16  |
| 488205 |                                                            | 2.03  |
| 488488 | Lecithin retinol acyltransferase                           | 1.68  |
| 489007 | FAD binding domain in molybdopterin dehydrogenase          | 2.42  |
| 489094 | No apical meristem (NAM) protein                           | 1.54  |
| 489237 | Remorin, C-terminal region                                 | 2.10  |
| 489370 | Cytochrome P450                                            | 1.83  |
| 489522 | Calmodulin binding protein-like                            | 1.86  |
| 489642 | Protein kinase domain                                      | 2.02  |
| 489742 | EamA-like transporter family                               | 2.81  |
| 489772 | Peroxidase                                                 | 5.83  |
| 489775 | Peroxidase                                                 | 3.62  |
| 489834 | Helix-loop-helix DNA-binding domain                        | 2.01  |
| 489946 | WRKY DNA -binding domain                                   | 1.64  |
| 490098 | Salt stress response/antifungal                            | 1.37  |
| 490355 | Cotton fibre expressed protein                             | -1.83 |
| 490500 | C2 domain                                                  | 2.47  |
| 490604 | Multicopper oxidase                                        | 1.75  |
| 490753 | FKBP-type peptidyl-prolyl cis-trans isomerase              | -2.68 |
| 490844 | VQ motif                                                   | 4.07  |
| 490882 | GH3 auxin-responsive promoter                              | 2.79  |
| 491113 | Papain family cysteine protease                            | -1.79 |
| 491132 | Transmembrane amino acid transporter protein               | 2.58  |
| 491170 | Alkaline and neutral invertase                             | 2.22  |
| 491342 |                                                            | 4.67  |
| 491541 | Cytochrome P450                                            | 6.78  |
| 491574 | B3 DNA binding domain                                      | 2.67  |

|        |                                                         |       |
|--------|---------------------------------------------------------|-------|
| 492068 | PAN-like domain                                         | 1.76  |
| 492072 | GH3 auxin-responsive promoter                           | 2.96  |
| 492157 | Fructose-bisphosphate aldolase class-I                  | -2.57 |
| 492227 | Aldose 1-epimerase                                      | 2.42  |
| 492254 | Fatty acid hydroxylase superfamily                      | 2.54  |
| 492327 | Ferric reductase NAD binding domain                     | -5.92 |
| 492338 | Alpha-amylase C-terminal beta-sheet domain              | -2.98 |
| 492412 | Phosphorylase superfamily                               | 3.58  |
| 492419 | Protein of unknown function (DUF679)                    | 3.31  |
| 492497 | Sodium/hydrogen exchanger family                        | 2.53  |
| 492542 | Protein tyrosine kinase                                 | 1.91  |
| 492547 | Salt stress response/antifungal                         | 2.13  |
| 492573 | Staygreen protein                                       | 2.55  |
| 492645 | Domain of unknown function (DUF3354)                    | -2.39 |
| 493065 | ABC transporter transmembrane region                    | 2.00  |
| 493212 | Putative peptidoglycan binding domain                   | 6.46  |
| 493376 | VQ motif                                                | 2.42  |
| 493537 | Cytochrome P450                                         | -2.31 |
| 493675 | HAD-hyrolase-like                                       | -2.23 |
| 493689 | Myb-like DNA-binding domain                             | 1.84  |
| 493869 | Glycerophosphoryl diester phosphodiesterase family      | 2.17  |
| 493913 |                                                         | 2.09  |
| 493970 | Leucine rich repeat                                     | 3.97  |
| 494088 | DSBA-like thioredoxin domain                            | 2.30  |
| 494099 | Proline dehydrogenase                                   | 2.14  |
| 494160 | Peptidase C26                                           | 3.04  |
| 494895 | Receptor family ligand binding region                   | 1.82  |
| 495299 | CAP160 repeat                                           | -2.22 |
| 495625 | Probable lipid transfer                                 | 4.31  |
| 495626 | Probable lipid transfer                                 | 3.18  |
| 495628 | Probable lipid transfer                                 | 1.92  |
| 495629 | Probable lipid transfer                                 | 2.97  |
| 495935 | NADH-quinone oxidoreductase cyanobacterial subunit N    | -1.62 |
| 496034 | Protein phosphatase 2C                                  | 1.88  |
| 496082 | Haloacid dehalogenase-like hydrolase                    | 2.80  |
| 496327 | AP2 domain                                              | 1.55  |
| 496399 | Leucine Rich Repeat                                     | -2.64 |
| 496502 | Pectate lyase                                           | -1.98 |
| 496593 | Inositol monophosphatase family                         | 1.49  |
| 496594 | Inositol monophosphatase family                         | 2.19  |
| 496697 | WRKY DNA -binding domain                                | 1.92  |
| 497144 |                                                         | 2.77  |
| 497434 | PsbP                                                    | -1.71 |
| 855924 | Glycosyl hydrolase family 14                            | 4.65  |
| 856363 | Protein phosphatase 2C                                  | 1.93  |
| 856370 | Bacterial extracellular solute-binding proteins, family | 0.89  |

|        |                                                            |       |
|--------|------------------------------------------------------------|-------|
| 857278 |                                                            |       |
| 858339 | Salt stress response/antifungal                            | 4.06  |
| 858352 | MatE                                                       | 2.16  |
| 859362 | Cupin                                                      | 3.83  |
| 860334 | Cupin                                                      | 3.49  |
| 861088 | Protein kinase domain                                      | 2.44  |
| 861238 |                                                            | 3.56  |
| 861637 | Tubulin C-terminal domain                                  | -1.92 |
| 862790 | Squalene epoxidase                                         | -3.13 |
| 863279 | Targeting protein for Xklp2 (TPX2)                         | 4.40  |
| 863875 | PAN-like domain                                            | 1.67  |
| 864007 | Protein kinase domain                                      | 2.06  |
| 864008 | Salt stress response/antifungal                            | 0.84  |
| 865684 | No apical meristem (NAM) protein                           | 1.65  |
| 865949 | F-box associated                                           | 2.33  |
| 866209 |                                                            | 6.93  |
| 866365 | NPH3 family                                                | 2.36  |
| 868358 |                                                            |       |
| 868935 |                                                            | 4.37  |
| 869016 | Protein kinase domain                                      | 3.00  |
| 869152 |                                                            | -5.51 |
| 870083 | ABC-2 type transporter                                     | 4.62  |
| 870781 | RNA recognition motif. (a.k.a. RRM, RBD, or RNP domain)    | 1.76  |
| 870958 | Glycosyl hydrolase family 1                                | 3.02  |
| 872183 | Glycosyl hydrolases family 28                              | 4.33  |
| 872280 | Glutathione S-transferase, N-terminal domain               | 2.42  |
| 872763 | Seven in absentia protein family-2012                      | 3.44  |
| 872815 | CCAAT-binding transcription factor (CBF-B/NF-YA) subunit B | 2.66  |
| 873233 | Calcineurin-like phosphoesterase                           | 3.40  |
| 873301 | No apical meristem (NAM) protein                           | 3.32  |
| 874670 | Cysteine-rich secretory protein family                     | 2.87  |
| 874671 | Cysteine-rich secretory protein family                     | 4.41  |
| 875179 |                                                            | 2.27  |
| 875778 | S-locus glycoprotein family                                | 1.72  |
| 876049 | NB-ARC domain                                              | 1.62  |
| 876737 | Phosphomannose isomerase type I                            | 1.95  |
| 876790 | D-mannose binding lectin                                   | 1.48  |
| 877206 | MatE                                                       | 1.49  |
| 877352 | Protein kinase domain                                      | 2.86  |
| 877459 | Methyltransferase domain                                   | -2.51 |
| 878291 | Universal stress protein family                            | 1.79  |
| 878877 | Mitochondrial carrier protein                              | -3.00 |
| 879378 | D-mannose binding lectin                                   | 1.92  |
| 880720 | Carbonic anhydrase                                         | 1.35  |

|        |                                                  |       |
|--------|--------------------------------------------------|-------|
| 881866 | Protein kinase domain                            | 2.06  |
| 883904 | Glycolipid transfer protein (GLTP)               | 2.55  |
| 884047 | NB-ARC domain                                    |       |
| 884048 | NB-ARC domain                                    |       |
| 884137 | Membrane transport protein                       | 3.05  |
| 884148 | Protein tyrosine kinase                          | 2.94  |
| 884156 | Leucine Rich Repeat                              | 2.28  |
| 884231 | Glutathione S-transferase, C-terminal domain     | 3.18  |
| 884253 | UDP-glucose 4-epimerase C-term subunit           | 3.71  |
| 884350 |                                                  | -2.28 |
| 884488 | NB-ARC domain                                    | 2.09  |
| 885526 |                                                  | -3.07 |
| 885699 | Ubiquitin-2 like Rad60 SUMO-like                 | 5.63  |
| 886302 |                                                  | 1.87  |
| 886352 | Transferase family                               | 1.89  |
| 886773 |                                                  | 2.70  |
| 886846 | Legume lectin domain                             | 4.02  |
| 887070 |                                                  | 2.22  |
| 887302 | Aminotransferase class I and II                  | 2.91  |
| 887802 | Fatty acid desaturase                            | -4.38 |
| 888182 | NADH:flavin oxidoreductase / NADH oxidase family | 3.25  |
| 888266 | Aminotransferase class IV                        | 1.78  |
| 888583 | UAA transporter family                           | 2.44  |
| 888835 | Family of unknown function (DUF706)              | 3.46  |
| 888929 | Glyoxalase-like domain                           | 5.80  |
| 889326 | Cupin                                            | 4.38  |
| 889331 |                                                  | 2.03  |
| 889332 | Putative lysophospholipase                       | 3.36  |
| 889719 | CRAL/TRIO domain                                 | 2.10  |
| 889959 | Putative peptidoglycan binding domain            | 1.71  |
| 889962 |                                                  | 1.96  |
| 890334 |                                                  |       |
| 890490 | Senescence regulator                             | 2.70  |
| 890765 | Phosphoribulokinase / Uridine kinase family      | -1.93 |
| 890825 | Isocitrate/isopropylmalate dehydrogenase         |       |
| 891113 |                                                  | -2.11 |
| 891246 | Trehalose-phosphatase                            | 2.52  |
| 891536 | Endonuclease/Exonuclease/phosphatase family      | 2.48  |
| 891603 | Plant invertase/pectin methylesterase inhibitor  | 2.19  |
| 891606 | Ferritin-like domain                             | 4.07  |
| 891956 | Isocitrate/isopropylmalate dehydrogenase         | 5.96  |
| 892077 | MATH domain                                      | 7.30  |
| 892640 | Protein tyrosine kinase                          | 3.86  |
| 893206 | Plant invertase/pectin methylesterase inhibitor  | 4.42  |
| 893249 | Zinc finger, C3HC4 type (RING finger)            | 2.73  |
| 893410 | Terpene synthase family, metal binding domain    | 5.25  |

|        |                                           |       |
|--------|-------------------------------------------|-------|
| 893660 | MatE-2012                                 | 2.86  |
| 893738 |                                           |       |
| 893739 | Aminotransferase class I and II           |       |
| 893984 | Photosynthetic reaction centre protein    | -1.74 |
| 894063 | Ribosomal protein S7p/S5e                 | -4.09 |
| 894894 | NADH dehydrogenase transmembrane subunit  | -1.99 |
| 895245 | Core-2/I-Branching enzyme                 | 2.10  |
| 895333 | Gibberellin regulated protein             | -3.11 |
| 895457 | Gamma-thionin family                      | 4.24  |
| 895565 |                                           | -3.29 |
| 895881 |                                           | 4.12  |
| 895978 | Cotton fibre expressed protein            | 2.73  |
| 896009 | Mitochondrial carrier protein             | 2.90  |
| 897110 | Exo70 exocyst complex subunit             | 1.62  |
| 897210 | Aromatic amino acid lyase                 | 1.73  |
| 897732 | Cytochrome P450                           | 3.41  |
| 897928 | 2Fe-2S iron-sulfur cluster binding domain | -2.19 |
| 898119 |                                           | 1.57  |
| 898417 | Cytochrome P450                           | 3.86  |
| 898600 | Protein of unknown function (DUF679)      | 4.05  |
| 898836 | AP2 domain                                | 2.24  |
| 899310 |                                           | 1.00  |
| 899622 |                                           | 2.97  |
| 899888 | Malic enzyme, NAD binding domain          | 2.80  |
| 900345 | Peroxidase                                | 3.44  |
| 900492 |                                           |       |
| 900807 |                                           | 3.03  |
| 901626 | Protein kinase domain                     | 2.08  |
| 901791 | Brix domain                               | -1.77 |
| 901802 |                                           | 3.55  |
| 902308 | Cellulose synthase                        | 1.85  |
| 903017 | GDSL-like Lipase/Acylhydrolase            | 1.94  |
| 903112 | Haloacid dehalogenase-like hydrolase      | 1.71  |
| 903754 | Chitinase class I                         | 1.72  |
| 903867 | Glycosyl hydrolase family 1               | 3.53  |
| 903868 | Glycosyl hydrolase family 1               | 2.62  |
| 904774 |                                           | 3.58  |
| 905380 | Protein of unknown function (DUF3639)     | 1.77  |
| 906119 |                                           |       |
| 906139 | Mitochondrial carrier protein             | 2.97  |
| 906184 |                                           |       |
| 906185 |                                           |       |
| 906354 | Protein kinase domain                     | 2.04  |
| 906615 |                                           |       |
| 906768 | Sodium/hydrogen exchanger family          | 1.73  |
| 906847 | Eukaryotic aspartyl protease              | -1.74 |

|        |                                                           |       |
|--------|-----------------------------------------------------------|-------|
| 906967 | C2 domain                                                 | 1.82  |
| 906971 | Rare lipoprotein A (RlpA)-like double-psi beta-barrel     | 1.76  |
| 907023 | Yippee putative zinc-binding protein                      | 4.28  |
| 907092 |                                                           | -5.29 |
| 907564 | Histidine phosphatase superfamily (branch 1)              | 1.88  |
| 907941 | PsbP                                                      | -1.80 |
| 908296 | Histidine phosphatase superfamily (branch 1)              | -4.14 |
| 909775 | Glycosyl hydrolase family 1                               | 6.38  |
| 910252 | Stress responsive A/B Barrel Domain                       | -3.14 |
| 910605 | Protein of unknown function, DUF642                       | -2.41 |
| 910767 | Exonuclease                                               | 2.60  |
| 911275 |                                                           | 4.09  |
| 911410 | NAD dependent epimerase/dehydratase family                | 2.11  |
| 912116 | Domain of unknown function (DUF4308)                      | -2.05 |
| 912435 | F-box domain                                              | 2.50  |
| 912617 |                                                           | 3.44  |
| 912862 | Possible lysine decarboxylase                             | 3.21  |
| 913202 |                                                           | 2.70  |
| 914188 | Trehalase                                                 | 2.03  |
| 914296 | Thaumatococcus family                                     | 6.39  |
| 914365 |                                                           | 2.82  |
| 914538 | Protein tyrosine kinase                                   | 2.39  |
| 914854 | FMN-dependent dehydrogenase                               | 4.15  |
| 915032 | Lipase (class 3)                                          | 2.23  |
| 916148 |                                                           | 2.36  |
| 916315 |                                                           |       |
| 916316 |                                                           |       |
| 916350 | Protein of unknown function (DUF1997)                     | 5.03  |
| 916533 | Wall-associated receptor kinase C-terminal                | 1.67  |
| 916973 | NB-ARC domain                                             | -7.19 |
| 917307 | AP2 domain                                                | 5.58  |
| 917443 |                                                           | 3.35  |
| 917741 | Bacterial extracellular solute-binding proteins, family 3 | 1.71  |
| 918363 | E1-E2 ATPase                                              |       |
| 918364 | haloacid dehalogenase-like hydrolase                      |       |
| 918486 |                                                           | -1.84 |
| 918509 | UDP-glucuronosyl and UDP-glucosyl transferase             | 2.85  |
| 918581 | GH3 auxin-responsive promoter                             | 2.85  |
| 919271 | Legume lectin domain                                      | 2.28  |
| 919466 |                                                           | 2.65  |
| 919817 |                                                           | 2.00  |
| 920005 | Protein kinase domain                                     | 1.80  |
| 920573 |                                                           | 5.00  |

---

**Supplementary Table 4: Overview and annotation of genes differential expressed only in the Swedish population.** Genes were obtained by differential expression analysis using DESeq by comparing Sweden selfed vs. Sweden outcrossed and by excluding the genes that were differentially expressed in both populations (see Supplementary Table 2). The table shows the annotation as retrieved by performing InterProScan on the samples. The last column gives the log2 fold changes in expression in the selfed compared to the non-selfed population.

| <b>Protein ID</b> | <b>InterProScan</b>                                      | <b>Log 2 Fold Change in Selfed</b> |
|-------------------|----------------------------------------------------------|------------------------------------|
| 315582            | Transferase family                                       | 1.25                               |
| 316436            | Thaumatococcus family                                    | 2.10                               |
| 316515            | GDSL-like Lipase/Acylhydrolase                           | 1.53                               |
| 322778            | GDSL-like Lipase/Acylhydrolase                           | -1.24                              |
| 323258            | Cofilin/tropomyosin-type actin-binding protein           | -2.75                              |
| 331145            |                                                          | 2.20                               |
| 335126            | Myb-like DNA-binding domain                              | 0.90                               |
| 337099            | HORMA domain                                             | -1.81                              |
| 344438            | F-box domain                                             | -3.12                              |
| 347816            | Leucine rich repeat N-terminal domain                    | -2.28                              |
| 351411            | Transferase family                                       | 2.16                               |
| 358204            | Core histone H2A/H2B/H3/H4                               | 2.03                               |
| 470302            |                                                          | 1.91                               |
| 470332            | Photosystem II Pbs27                                     | 1.72                               |
| 470488            | Thioredoxin                                              | 1.57                               |
| 470654            | Fatty acid desaturase                                    | 2.26                               |
| 472537            |                                                          | 2.07                               |
| 472779            | FAD binding domain                                       | 2.73                               |
| 473113            | Ribosomal protein L34                                    | 1.50                               |
| 473523            |                                                          | 1.65                               |
| 474480            | Chalcone-flavanone isomerase                             | 3.00                               |
| 474482            | Hsp20/alpha crystallin family                            | 2.46                               |
| 475984            | Plastid and cyanobacterial ribosomal protein             | 1.15                               |
| 476914            | Peroxidase                                               | 1.44                               |
| 477371            | Carbonic anhydrase                                       | 1.87                               |
| 477375            | Cyclophilin type peptidyl-prolyl cis-trans isomerase/CLD | 1.63                               |
| 477690            | GDSL-like Lipase/Acylhydrolase                           | 2.00                               |
| 477705            |                                                          | -1.85                              |
| 478781            | Glycosyl hydrolases family 32 C terminal                 | 2.41                               |
| 478836            | GDSL-like Lipase/Acylhydrolase                           | 1.68                               |
| 478873            | Polyprenyl synthetase                                    | 2.65                               |
| 478916            | Uroporphyrinogen decarboxylase (URO-D)                   | 1.38                               |
| 479077            | Major intrinsic protein                                  | 2.09                               |
| 479089            | GDSL-like Lipase/Acylhydrolase                           | 1.44                               |
| 480223            | Photosystem II reaction centre X protein (PsbX)          | 1.18                               |
| 480563            | Major intrinsic protein                                  | 1.71                               |
| 480771            |                                                          | 2.12                               |
| 481081            | Gelsolin repeat                                          | 3.15                               |
| 481775            | Plant transposon protein                                 | 1.81                               |
| 481893            | UDP-glucuronosyl and UDP-glucosyl transferase            | -1.64                              |



|        |                                                          |       |
|--------|----------------------------------------------------------|-------|
| 482547 | Domain of unknown function (DUF588)                      | -1.19 |
| 484604 | MATH domain                                              | 2.93  |
| 484691 | Uncharacterized ACR, COG1678                             | 1.17  |
| 485048 | NADH(P)-binding                                          | 1.54  |
| 485112 | Chlorophyll A-B binding protein                          | 2.15  |
| 485118 | Chitinase class I                                        | 2.70  |
| 486168 | Glycosyl hydrolases family 17                            | 2.93  |
| 488045 | Hsp20/alpha crystallin family                            | 1.76  |
| 488726 | D-mannose binding lectin                                 | 1.71  |
| 489312 | Sigma 54 modulation protein / S30EA ribosomal protein    | 2.04  |
| 489446 | Glycosyl hydrolase family 1                              | 1.45  |
| 489709 | Peroxidase                                               | 1.37  |
| 489817 | ATP synthase delta (OSCP) subunit                        | 1.12  |
| 489869 | Hsp20/alpha crystallin family                            | 2.95  |
| 490836 | Xyloglucan endo-transglycosylase (XET) C-terminus        | 1.41  |
| 492051 | short chain dehydrogenase                                | 3.53  |
| 492328 | Magnesium-protoporphyrin IX methyltransferase C-terminus | 1.59  |
| 492755 | Oxygen evolving enhancer protein 3 (PsbQ)                | 1.57  |
| 493327 | UDP-glucuronosyl and UDP-glucosyl transferase            | 1.55  |
| 493595 | Chloroplast protein precursor Ycf15 putative             | 6.75  |
| 494078 | Cupin                                                    | 4.38  |
| 494136 | Ribulose-1,5-bisphosphate carboxylase small subunit      | 1.49  |
| 494137 | Ribulose bisphosphate carboxylase, small chain           | 1.76  |
| 494249 | Palmitoyl protein thioesterase                           | -2.34 |
| 494386 | Magnesium chelatase, subunit ChII                        | 1.95  |
| 495095 |                                                          | 0.99  |
| 495160 | Fumarase C C-terminus                                    | 0.93  |
| 495501 | short chain dehydrogenase                                | 5.12  |
| 495659 | Fasciclin domain                                         | 1.94  |
| 496104 | Hsp20/alpha crystallin family                            | 1.63  |
| 496228 | Heavy-metal-associated domain                            | 1.81  |
| 496724 | Annexin                                                  | -3.18 |
| 497157 | Glutathione S-transferase, N-terminal domain             | 1.23  |
| 497425 |                                                          | -0.95 |
| 856310 | NAD(P)-binding Rossmann-like domain                      | 2.64  |
| 864354 |                                                          | -2.10 |
| 865964 | Zinc knuckle                                             | 3.37  |
| 868649 | Glutamine amidotransferase class-I                       | -1.33 |
| 872501 | UDP-glucuronosyl and UDP-glucosyl transferase            | 2.78  |
| 876642 | Formyl transferase                                       | -2.68 |
| 881642 | Hsp20/alpha crystallin family                            | 2.17  |
| 882492 | Cysteine-rich secretory protein family                   | 4.03  |
| 883330 | Protein kinase domain                                    | 1.69  |
| 883800 | F-box associated                                         | 1.93  |

|        |                                                       |       |
|--------|-------------------------------------------------------|-------|
| 890625 | Berberine and berberine like                          | 2.47  |
| 892108 |                                                       | 2.29  |
| 892609 |                                                       |       |
| 892638 | Protein tyrosine kinase                               | -1.47 |
| 892824 | Core histone H2A/H2B/H3/H4                            | 2.06  |
| 892975 | Glycosyl hydrolase family 9                           | 1.47  |
| 893116 | ABC transporter                                       | -4.83 |
| 894122 |                                                       | 3.90  |
| 894159 | Late embryogenesis abundant protein                   | 1.48  |
| 894808 |                                                       | 2.47  |
| 894902 | Pathogenesis-related protein Bet v I family           | 1.03  |
| 895063 | POT family                                            | 1.54  |
| 898865 | Flavin containing amine oxidoreductase                | 1.82  |
| 899019 | Alpha/beta hydrolase family                           | 1.59  |
| 900301 |                                                       | 4.69  |
| 900474 |                                                       | 1.90  |
| 900498 |                                                       | -0.58 |
| 900653 |                                                       |       |
| 900658 |                                                       |       |
| 901851 | Rare lipoprotein A (RlpA)-like double-psi beta-barrel | 1.85  |
| 902030 | Myb-like DNA-binding domain                           | 1.55  |
| 902799 | UDP-glucuronosyl and UDP-glucosyl transferase         | 1.91  |
| 903400 | Myb-like DNA-binding domain                           | -1.68 |
| 903677 | GDSL-like Lipase/Acylhydrolase                        | 2.52  |
| 904536 |                                                       |       |
| 905021 | Chlorophyll A-B binding protein                       | 3.11  |
| 905079 |                                                       | 3.44  |
| 905420 |                                                       | 3.51  |
| 905859 | DVL family                                            | 3.71  |
| 905912 |                                                       |       |
| 906213 | Papain family cysteine protease                       | -2.38 |
| 907497 | GNAT acetyltransferase 2                              | -1.10 |
| 908373 | Sec1 family                                           | -1.89 |
| 908552 | AhpC/TSA family                                       | 1.98  |
| 908912 | Ferritin-like domain                                  | -3.59 |
| 908994 | Core histone H2A/H2B/H3/H4                            | 1.52  |
| 909035 | Eukaryotic aspartyl protease                          | -1.22 |
| 909242 | Leucine rich repeat N-terminal domain                 | 0.79  |
| 909291 | GH3 auxin-responsive promoter                         | 1.55  |
| 909315 | Domain of unknown function (DUF3479)                  | 1.15  |
| 910104 | Cupin                                                 | 5.02  |
| 910242 | Male sterility protein                                | 2.18  |
| 911648 |                                                       | 1.95  |
| 912392 | Zinc-binding dehydrogenase                            | 2.31  |
| 912528 |                                                       | -2.05 |
| 914076 | Phosphopantetheine attachment site                    | 0.75  |

|        |                                      |      |
|--------|--------------------------------------|------|
| 914433 | Multicopper oxidase                  | 1.62 |
| 916700 | Palmitoyl protein thioesterase       |      |
| 920182 | Protein of unknown function (DUF626) | 4.16 |

---

**Supplementary Table 5: Statistical overrepresentation of gene ontologies (GOs) in the differentially expressed genes of the Norwegian population.**  
 GO overrepresentation of differentially expressed genes was performed with the Cytoscape plugin BINGO which tests for overrepresentation by hypergeometric testing using a Benjamini-Hochberg correction.

| Description          | p-value   | Genes in test set                                                                                                                                                                                                                                                                                                                                                                                                                                                                                                                                                                                                                                                                                                                                                                                                                                                                                                                                                                                                                                                                                                                                                                                                                                                                                                                                                                                                                                                                                                                                                                                                                                                                                                                           |
|----------------------|-----------|---------------------------------------------------------------------------------------------------------------------------------------------------------------------------------------------------------------------------------------------------------------------------------------------------------------------------------------------------------------------------------------------------------------------------------------------------------------------------------------------------------------------------------------------------------------------------------------------------------------------------------------------------------------------------------------------------------------------------------------------------------------------------------------------------------------------------------------------------------------------------------------------------------------------------------------------------------------------------------------------------------------------------------------------------------------------------------------------------------------------------------------------------------------------------------------------------------------------------------------------------------------------------------------------------------------------------------------------------------------------------------------------------------------------------------------------------------------------------------------------------------------------------------------------------------------------------------------------------------------------------------------------------------------------------------------------------------------------------------------------|
| carbohydrate binding | 3.8104E-8 | 861088 869016 914538 477741 919271 876790 318019 903754 483469 492068 879372 863875 483470 875778 879378 911976 346169 479116 870854 886846 492227<br>494088 891536 480406 903754 861637 885699 476696 881866 490098 880720 903112 334097 494099 486477 486479 327935 476695 475808 487053 328029 476141 899888 901626 870083 911976 486481 903868 862790 903867 331197 326599 482737 493212 475262 487844 471868 484387 484388 481168 897210 870958 471294 484965 909775 914854 346891 863875 315131 488319 492227 876737 483936 332024 329840 470382 475178 484123 471117 879372 890825 884137 472361 879378 353102 489370 481887 318019 313855 496593 496594 893206 910767 900345 491113 892640 915032 471526 318682 898417 481994 920005 489772 493878 494390 476582 889581 489965 319814 492338 479864 873233 485691 490604 472226 481863 496082 884253 914188 908138 472635 893410 492327 472778 884148 861088 856363 914538 476608 864007 483526 864008 312863 472781 472780 317500 492157 890765 352125 329886 891603 475879 493675 493970 918364 918363 888182 491721 489775 902535 470930 485496 355259 492486 484318 353505 493869 489642 476725 893739 348799 918509 906073 492412 477857 327109 877352 899117 496034 483469 480389 329582 902308 483470 475766 323821 343972 878291 353011 470440 891246 485103 331608 496502 865114 855339 320824 907023 486718 869016 493537 471013 908296 903017 887802 324269 480225 338258 906354 496399 485452 484885 483895 875778 346169 478210 480324 491541 474819 887302 492542 872183 919271 492547 889959 888835 354029 478341 871042 473561 350231 489007 497196 870854 312603 911410 886846 487575 493065 888266 487785 876790 487885 492068 487282 312409 479069 471443 485216 |
| catalytic activity   | 6.1502E-5 |                                                                                                                                                                                                                                                                                                                                                                                                                                                                                                                                                                                                                                                                                                                                                                                                                                                                                                                                                                                                                                                                                                                                                                                                                                                                                                                                                                                                                                                                                                                                                                                                                                                                                                                                             |

|                           |           |        |        |        |        |        |        |        |
|---------------------------|-----------|--------|--------|--------|--------|--------|--------|--------|
| pollination               | 5.4049E-4 | 492068 | 879372 | 914538 | 863875 | 875778 | 879378 | 475178 |
| pollen-pistil interaction | 5.4049E-4 | 492068 | 879372 | 914538 | 863875 | 875778 | 879378 | 475178 |
| extracellular region      | 5.4049E-4 | 906971 | 860334 | 494895 | 493212 | 874670 | 874671 | 889959 |
| reproduction              | 1.4655E-3 | 859362 | 485216 |        |        |        |        | 491721 |
| cell communication        | 2.0331E-3 | 492068 | 879372 | 914538 | 863875 | 875778 | 879378 | 475178 |
| proteinaceous             |           |        |        |        |        |        |        |        |
| extracellular matrix      | 3.4345E-3 | 493212 | 889959 | 476141 |        |        |        |        |
| receptor activity         | 4.1177E-2 | 917741 | 884488 | 475633 | 471969 | 892640 | 494895 | 856370 |
|                           |           | 884137 | 884148 |        |        |        |        | 493970 |
|                           |           |        |        |        |        |        |        | 477857 |
|                           |           |        |        |        |        |        |        | 477682 |
|                           |           |        |        |        |        |        |        | 496399 |
|                           |           |        |        |        |        |        |        | 481829 |

**Supplementary Table 6: Statistical overrepresentation of gene ontologies (GOs) in the differentially expressed genes of the Swedish population.**  
 GO overrepresentation of differentially expressed genes was performed with the Cytoscape plugin BINGO which tests for overrepresentation by hypergeometric testing using a Benjamini-Hochberg correction.

| Description                                    | p-value    | Genes in test set                                                                                                                                                                                                                                                                                                                                                                                                                                                                                                                                                                                    |
|------------------------------------------------|------------|------------------------------------------------------------------------------------------------------------------------------------------------------------------------------------------------------------------------------------------------------------------------------------------------------------------------------------------------------------------------------------------------------------------------------------------------------------------------------------------------------------------------------------------------------------------------------------------------------|
| photosynthesis                                 | 1.0918E-15 | 495512 492051 473204 473203 495501 478197 494386 474626 482403 492755 496598 485112 899321 492328 480223 905021                                                                                                                                                                                                                                                                                                                                                                                                                                                                                      |
| generation of precursor metabolites and energy | 1.1043E-3  | 495512 489817 485112 473204 473203 899321 478197 482403 905021                                                                                                                                                                                                                                                                                                                                                                                                                                                                                                                                       |
| plastid                                        | 1.1043E-3  | 475984 492051 495501 494137 494136                                                                                                                                                                                                                                                                                                                                                                                                                                                                                                                                                                   |
| metabolic process                              | 1.3940E-3  | 490836 480225 905079 910104 901851 491721 494078 882492                                                                                                                                                                                                                                                                                                                                                                                                                                                                                                                                              |
| extracellular region                           | 2.1284E-3  | 903677 493878 914076 477690 898865 478873 478836 322778 479089 316515 470654                                                                                                                                                                                                                                                                                                                                                                                                                                                                                                                         |
| lipid metabolic process                        | 4.1340E-3  | 474626 496598 492755 480223                                                                                                                                                                                                                                                                                                                                                                                                                                                                                                                                                                          |
| thylakoid                                      | 9.9842E-3  | 490836 892975 492486 492051 495501 491721 485118 480225 486168 329582 478781 348799 346169 489446 870854                                                                                                                                                                                                                                                                                                                                                                                                                                                                                             |
| carbohydrate metabolic process                 | 2.2840E-2  | 490836 871042 893116 480225 491721                                                                                                                                                                                                                                                                                                                                                                                                                                                                                                                                                                   |
| external encapsulating structure               | 2.8134E-2  | 909242 495501 483526 489709 472781 472780 470488 478916 347816 879372 883330 890625 914433 476914 865114 316515 470654 497157 892975 477371 492051 320824 477375 487053 491721 876642 892638 903677 481893 495160 480225 486168 909035 906213 902535 346169 911976 479089 492486 898865 868649 494386 481994 902799 912392 354029 494249 493878 494390 871042 474480 893116 493327 889581 489965 494137 497196 494136 348799 496724 870854 485691 490836 908552 489817 906073 478836 481863 322778 899117 485118 477690 329582 908138 478781 472779 488319 475766 337099 472778 489446 492328 872501 |
| catalytic activity                             | 3.3568E-2  |                                                                                                                                                                                                                                                                                                                                                                                                                                                                                                                                                                                                      |

**Supplementary Table 7: Overview of SNP calling with GATK based SNP calling.** The amount of detected SNPs for each round of SNP calling for each population and treatment is given below. The database for the first SNP call is based on the overlap for each population from the primary SNP calling. Overlap for each population of each round was used as database input for the next round of SNP calling.

|                                                        | Norway<br>outcrossed | Norway<br>selfed | Sweden<br>outcrossed | Sweden<br>selfed |
|--------------------------------------------------------|----------------------|------------------|----------------------|------------------|
| <b>Overlap of preliminary SNP calling</b>              | 214,313              | 219,626          | 325,285              | 336,162          |
| <b>SNP calling in GATK using overlap</b>               | 752,747              | 788,590          | 1,233,356            | 1,288,294        |
| <b>1<sup>st</sup> Iteration of SNP calling in GATK</b> | 802,937              | 839,978          | 1,346,785            | 1,411,425        |
| <b>2<sup>nd</sup> Iteration of SNP calling in GATK</b> | 803,913              | 841,003          | 1,349,520            | 1,414,490        |
| <b>3<sup>rd</sup> Iteration of SNP calling in GATK</b> | 804,029              | 841,016          | 1,349,523            | 1,414,570        |
| <b>4<sup>th</sup> Iteration of SNP calling in GATK</b> | 804,036              | 841,107          | 1,349,556            | 1,414,578        |
| <b>5<sup>th</sup> Iteration of SNP calling in GATK</b> | 803,985              | 841,073          | 1,349,614            | 1,414,668        |

**Supplementary Table 8: Variance in gene expression in each group of samples.** For each gene, population and condition, variances in expression among replicates were calculated and the mean and variance of these variances were determined.

|                              | <b>Norway outcrossed</b> | <b>Norway selfed</b> | <b>Sweden outcrossed</b> | <b>Sweden selfed</b> |
|------------------------------|--------------------------|----------------------|--------------------------|----------------------|
| <b>Mean of variances</b>     | 0.831                    | 0.882                | 0.541                    | 0.669                |
| <b>Variance of variances</b> | 3.260                    | 5.694                | 0.763                    | 2.145                |



A

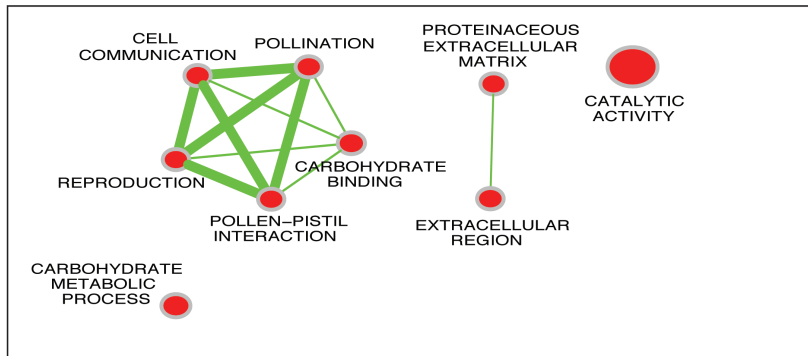

B

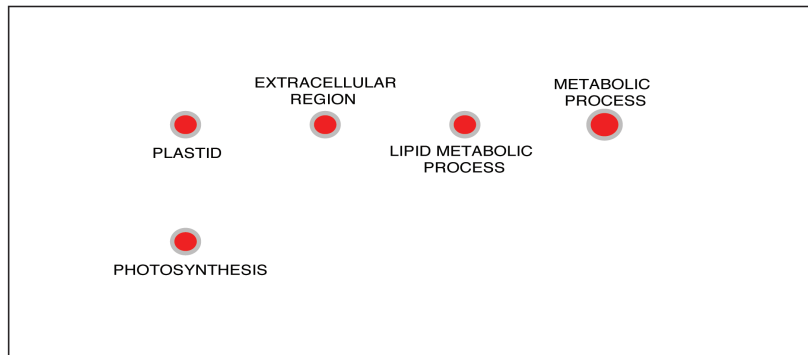

**Supplementary Figure 1: Enrichment analysis of the genes that were significantly differentially expressed in selfed and outcrossed progeny only in (A) Norway and (B) Sweden.** Enrichment map, built upon GO annotation (Cytoscape plugins BiNGO and EnrichmentMap), providing insights into GO terms that are highly significant and their interactions in each of the populations.

## Norway

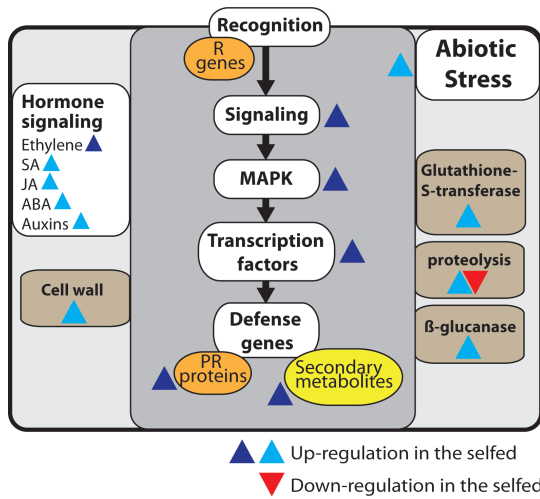

## Sweden

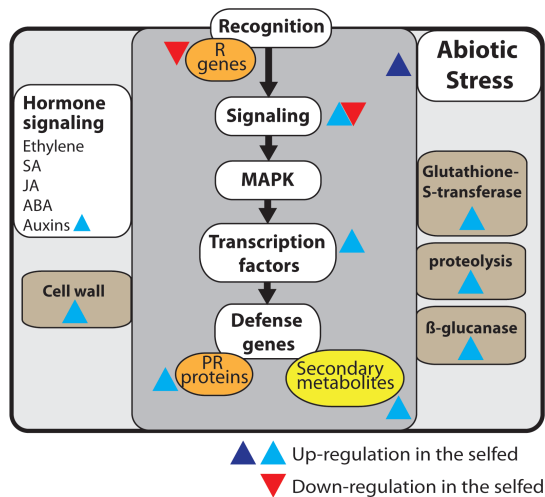

**Supplementary Figure 2: Results from biotic stress pathway analyses in the Norwegian and the Swedish population, respectively.** The analyses were based on the genes that were significantly differentially expressed only in the respective population. Assignment of the genes into pathways was achieved by ortholog Markov clustering against *A. thaliana* and mapping of orthologs into pathways. Blue signifies a positive log<sub>2</sub> fold change in the selfed compared to the outcrossed (up-regulation; dark blue: many genes, light blue: single genes), whereas red signifies a negative log<sub>2</sub> fold change in the selfed compared to the outcrossed (down-regulation).

## Norway

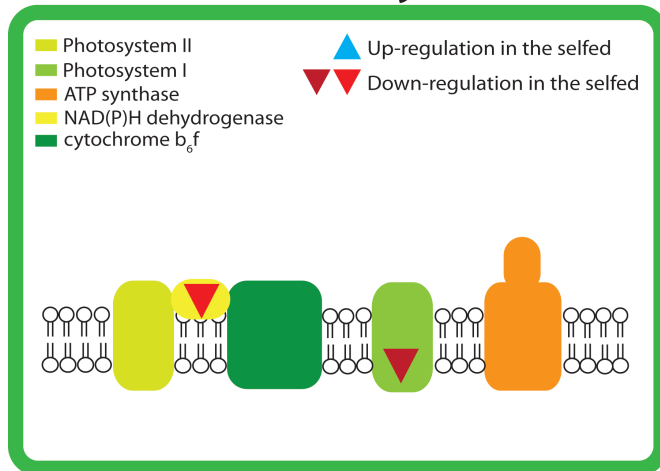

## Sweden

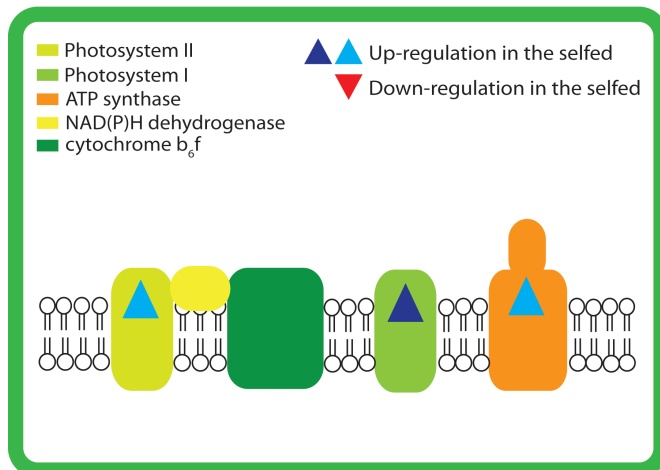

**Supplementary Figure 3: Results from chloroplast pathway analyses in the Norwegian and the Swedish population, respectively.** The analyses were based on the genes that were significantly differentially expressed only in the respective population. Assignment of genes into pathways was achieved by ortholog Markov clustering against *A. thaliana* and mapping of orthologs into pathways. Blue signifies a positive log<sub>2</sub> fold change in the selfed compared to the outcrossed (up-regulation; dark blue: many genes, light blue: single genes), whereas red signifies a negative log<sub>2</sub> fold change in the selfed compared to the outcrossed (down-regulation).

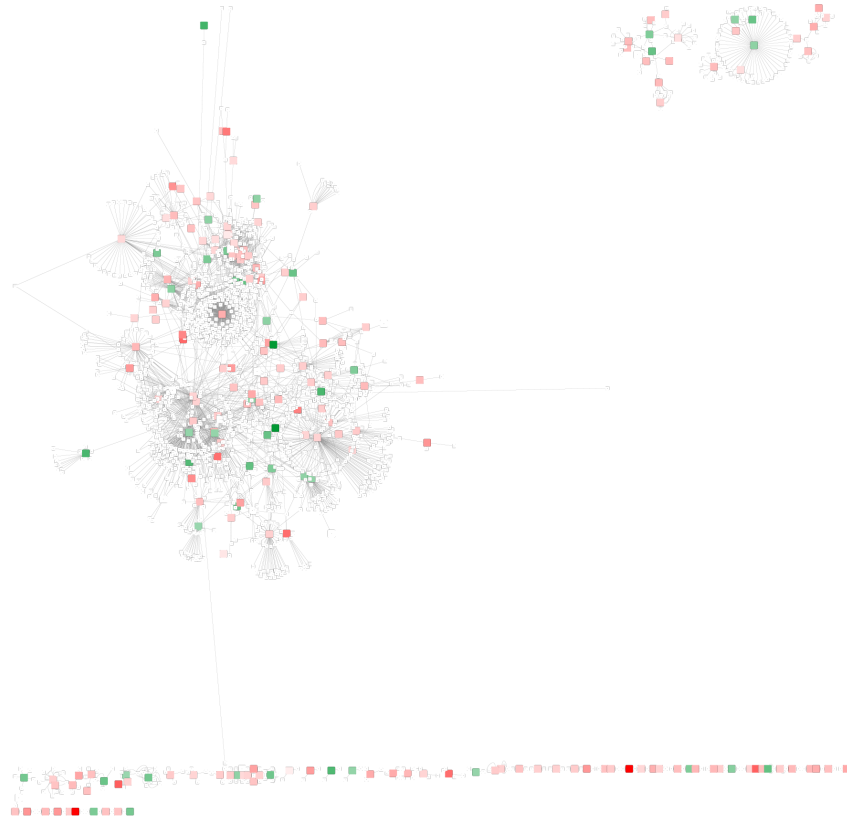

**Supplementary Figure 4: Gene interaction network for 224 genes that were significantly differentially expressed in the Norwegian population.** Interactions were restricted to first neighbour interactions. Nodes, representing the differentially expressed genes, are coloured by fold change (red/pink: highly/moderately up-regulated in selfed progeny; dark/pale green: strongly/moderately down-regulated in selfed progeny).

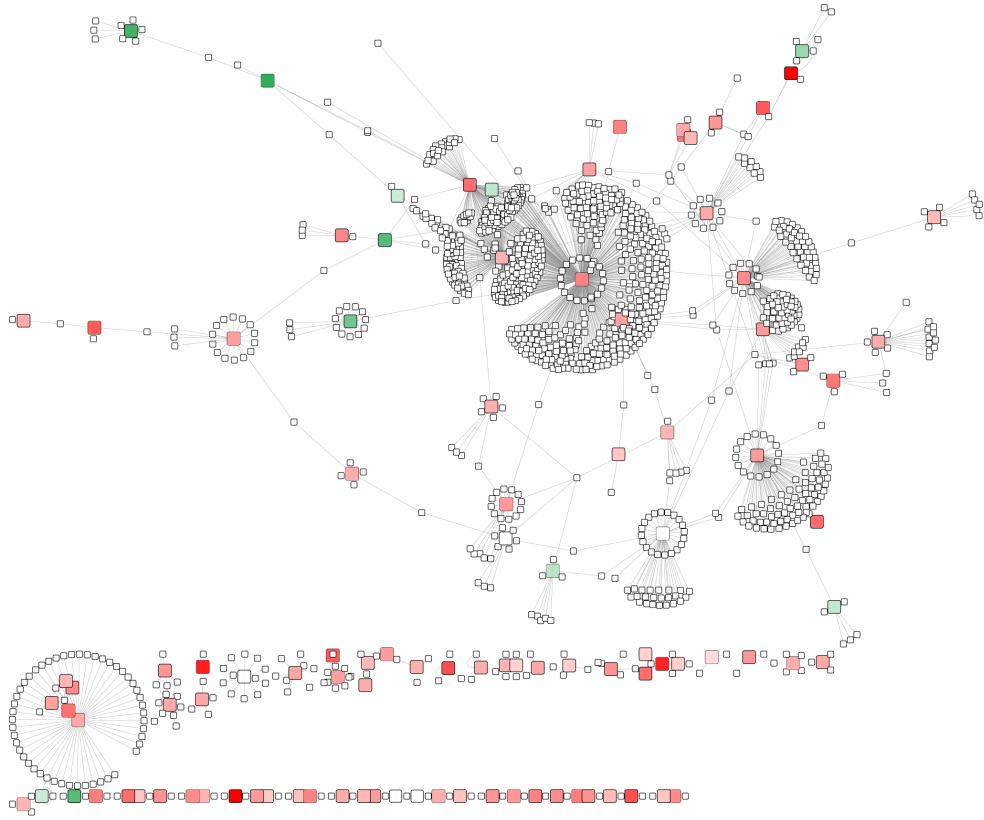

**Supplementary Figure 5: Gene interaction network for 104 genes that were significantly differentially expressed in the Swedish population.** Interactions were restricted to first neighbour interactions. Nodes, representing the differentially expressed genes, are coloured by fold change (red/pink: highly/moderately up-regulated in selfed progeny; dark/pale green: strongly/moderately down-regulated in selfed progeny).

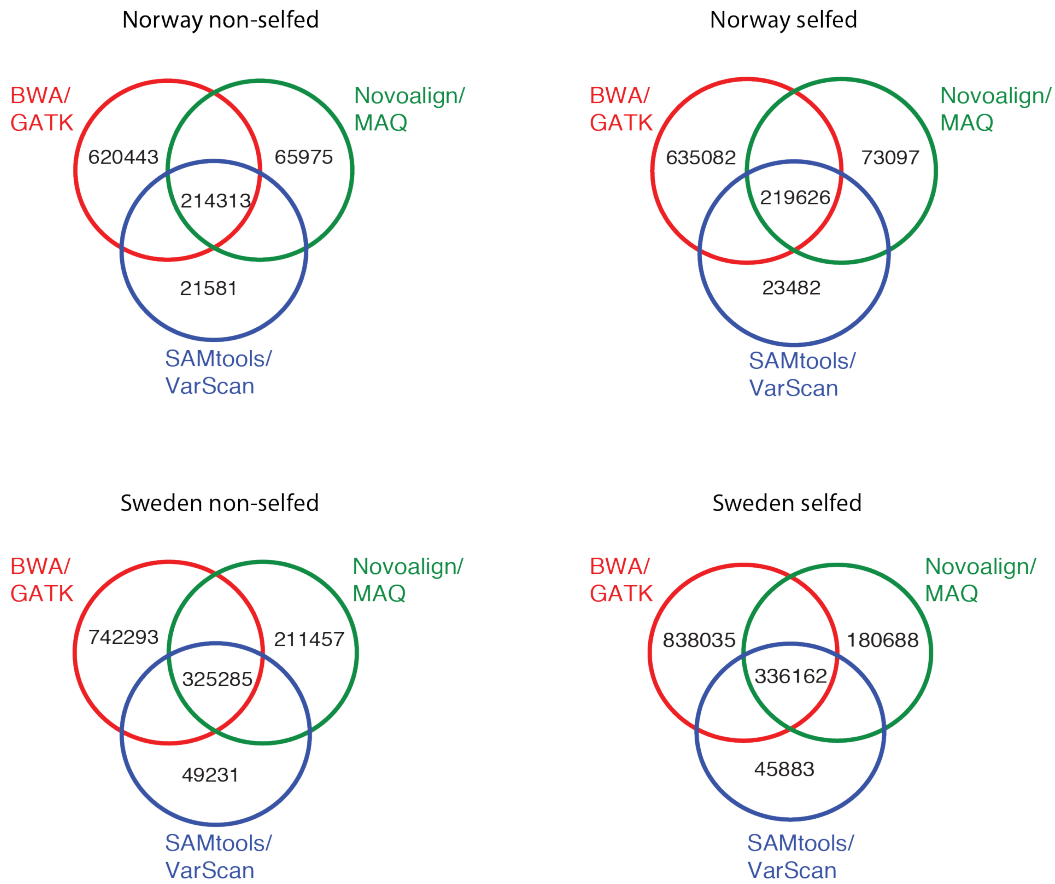

**Supplementary Figure 6: Results from SNP calling.** SNPs were called using three different methods: alignment with BWA followed by SNP calling with GATK using a SNP database created with Freebayes (red), alignment with Novoalign followed by SNP calling with MAQ (green) and alignment with TopHat followed by SNP calling with SAMtools and VarScan (blue). The overlap of the resulting amount of SNPs for each approach and population and treatment is shown as Venn diagrams.

## Supplementary Material 2

### SNP calling Methods and Results

#### Methods

SNP calling was performed using three different programs and methods:

For the first approach reads were assembled with BWA (version 0.6.2 (Li and Durbin 2009)) and the resulting alignment was used for SNP calling with Freebayes (version 0.9.6; <http://arxiv.org/abs/1207.3907>) which output was used as a database to feed into GATK (version 2.1.13 (McKenna, et al. 2010; DePristo, et al. 2011)). The actual SNP calling on the alignment was then performed with GATK using the Freebayes generated SNP database for each individual. For the final SNP calling step individuals for one treatment and population were merged. GATK takes coordinate sorted alignments as input. These alignments are then locally realigned to avoid areas of misalignment. Afterwards duplicated reads are marked and removed, the best pair is kept. Based on a provided SNP database base quality scores are recalibrated, so that bases which agree with the bases in the SNP database are assigned a high quality score. This gives more confidence to the base calls. Then replicates are input into the UnifiedGenotyper, a multi-sample SNP calling tool that uses a Bayesian genotype likelihood to call SNPs.

For the second approach, reads were aligned against the reference genome with Novoalign (version 2.08.03; <http://www.novocraft.com/>) and then converted to a format used by the aligner MAQ (version 0.7.1 (Li, et al. 2008)). Assemblies of all individuals were merged for each treatment and population and SNPs were called and filtered using default parameters. First MAQ assembles the consensus of all replicates based on a statistical model. It then calculates a quality score for each base of the consensus. Later SNPs are filtered. The default parameters are as followed: 1) discard SNPs with 3bp flanking region around potential indel, 2) discard SNPs covered by three or fewer reads, 3) discard SNPs covered by no read with mapping quality >60, 4) if three or more SNPs fall into a 10 bp window, discard all, 5) discard SNP with consensus quality <10.

For the third approach the TopHat (version 2.04 (Trapnell, et al. 2009)) alignment was used and fed into SAMtools (version 0.1.18 (Li, et al. 2009)) using the mpileup command, combining the alignment of one treatment and population. Afterwards SNPs were called using VarScan (version 2.3.3 (Koboldt, et al. 2012)) and filtered using a p-value of 0.05.

SAMtool's mpileup function generates a pileup of bases by aligning reads to the reference genome. For each base it computes a base alignment quality (BAQ), the probability that a base is misaligned, to rule out false-positives. VarScan then employs a heuristic/statistic approach to call variants from the pileup that meets certain threshold criteria.

A detailed pipeline for all programs is found below.

The results of the above-mentioned SNP calling procedures were overlapped for one treatment and population and the overlap for selfed and non-selfed was then merged for each population and used as a database for SNP calling with GATK. The resulting SNPs for each treatment and population were again overlapped (overlap of selfed and non-selfed of one population) and low quality SNP predictions were filtered out before a new round of SNP calling with GATK was performed. This procedure was performed five times in total (until the number of SNPs stabilised).

#### i) SNP calling with BWA, Freebayes and GATK

(Nb! Notation "x" signifies sample name.)

First reads were aligned with BWA.

```
bwa index Araly1_assembly_scaffolds.fasta
bwa aln -t8 Araly1_assembly_scaffolds.fasta x_1.fastq > x_1.sai
bwa aln -t8 Araly1_assembly_scaffolds.fasta x_2.fastq > x_2.sai
bwa sampe Araly1_assembly_scaffolds.fasta x_1.sai x_2.sai x_1.fastq x_2.fastq
> x.sam
```

In the next step the alignment was sorted and indexed with SAMtools.

```
samtools view -bt Araly1_assembly_scaffolds.fasta.fai x.sam > x.bam
samtools sort x.bam > x.sorted
samtools index x.sorted.bam
```

Then read groups unique for each sample were added with Picard tools (version 1.81; <http://picard.sourceforge.net>).

```
java -jar AddOrReplaceReadGroups.jar INPUT=x.sorted.bam OUTPUT=xpicard.bam
SORT_ORDER=coordinate CREATE_INDEX=true RGPL=illumina RGSM=x RGLB=x RGPU=x
VALIDATION_STRINGENCY=LENIENT
```



This was followed by local realignment with GATK.

```
java -jar GenomeAnalysisTK.jar -T RealignerTargetCreator -R
Analy1_assembly_scaffolds.fasta -I xpicard.bam -o x.intervals

java -jar GenomeAnalysisTK.jar -T IndelRealigner -R
Analy1_assembly_scaffolds.fasta -I xpicard.bam -targetIntervals x.intervals -
o xrealigned.bam --filter_mismatching_base_and_qual
```

Afterwards duplicates were marked and removed using Picard tools.

```
java -jar MarkDuplicates.jar INPUT=xrealigned.bam REMOVE_DUPLICATES=
true VALIDATION_STRINGENCY=LENIENT AS=true METRICS_FILE=x.dubs
OUTPUT=x.realnDup.bam

samtools index x.realnDup.bam
```

In the next step a SNP database for each individual was created using Freebayes, which in a later step was fed into GATK.

```
freebayes --fasta-reference Analy1_assembly_scaffolds.fasta xpicard.bam >
x_knownSites.vcf
```

Now base quality recalibration was performed with GATK.

```
java -jar GenomeAnalysisTK.jar -T BaseRecalibrator -I xrealnDup.bam
-R Analy1_assembly_scaffolds.fasta -knownSites x_knownSites.vcf -o
x.recal_data.grp --disable_indel_qual

java -jar GenomeAnalysisTK.jar -T PrintReads -R Analy1_assembly_
scaffolds.fasta -I x.realnDup.bam -BQSR x.recal_data.grp -o x.recal.bam
```

Finally SNPs were called with GATK on merged samples for each treatment and population.

```
java -jar GenomeAnalysisTK.jar -T CombineVariants -R Analy1_assembly_
scaffolds.fasta --variant x1_knownSites.vcf [--variant xn_knownSites
.vcf] -o merged_knownSites.vcf -genotypeMergeOptions UNIQUIFY

java -jar GenomeAnalysisTK.jar -T UnifiedGenotyper -R Analy1_assembly_
scaffolds.fasta -I x1.recal.bam [-I xn.recal.bam] -dbSNP merged_known
Sites.vcf -o merged_GATKvariants.raw.vcf -stand_call_conf 50.0 -stand_
emit_conf 10.0 -dcov 100 -glm BOTH

java -jar GenomeAnalysisTK.jar -T SelectVariants -R Analy1_assembly_
scaffolds.fasta --variant merged_GATKvariants.raw.vcf -selectType SNP -log
merged.SelectSNPs.log -o merged.GATKsnps.raw.vcf
```

## ii) SNP calling with Novoalign and MAQ

First reads were aligned with Novoalign.

```
novoindex Araly_reference.nix Araly1_assembly_scaffolds.fasta
novoalign -d Araly_reference.nix -f x_1.fastq x_2.fastq > x.novo
```

Now the alignment needed to be converted to a format used by the MAQ assembler.

```
novoutil n2mhdrs Araly1_assembly_scaffolds.fasta > in.list
novo2maq x.map in.list x.novo
```

In the following step samples were merged according to each treatment and population and were later assembled with MAQ.

```
maq mapmerge merged.map x1.map [xn.map]
maq fasta2bfa Araly1_assembly_scaffolds.fasta Araly_reference.bfa
maq assemble merged.cns Araly_reference.bfa merged.map
```

In the last step SNPs were called and filtered with MAQ using default parameters.

```
maq cns2snp merged.cns > merged.snp
maq.pl SNPfilter merged.snp > merged.filtered.snp
```

## iii) SNP calling with SAMtools and VarScan

For this approach the TopHat output (see *Transcriptome assembly* above) was used. This alignment was fed into SAMtools to generate a pileup for each treatment and population.

```
samtools mpileup -f Araly1_assembly_scaffolds.fasta x1.bam [xn.bam] >
merged.mpileup
```

This was followed by SNP calling and filtering with VarScan.

```
java -jar VarScan.jar mpileup2snp merged.mpileup --p-value 0.05 --output-vcf
1 > merged.snp.vcf
```

## **Results**

For preliminary SNP calling three approaches were used as described in Supplementary Method 1E. The number of SNPs called varied largely between the different methods.

Common to all was that they detected a larger amount of SNPs in the selfed of both populations compared to the non-selfed and more SNPs in the population Sweden compared with Norway (Supplementary Figure 1). The overlap included 14313 SNPs common for Norway non-selfed, 219626 SNPs common for Norway selfed, 325285 SNPs common for Sweden non-selfed and 336162 SNPs common for Sweden selfed. Based on these results, the overlap of both treatments for one population was used for further SNP calling with GATK. This GATK calling was performed in five iterations. It could be seen that the differences in the amount of detected SNPs between each round of SNP calling became smaller and smaller and almost converged. After the fifth iteration Sweden showed more SNPs than Norway and the selfed of both populations (~841100 for Norway and ~1414700 for Sweden) showed more SNPs than the non-selfed (~804000 for Norway and 1349600 for Sweden). Supplementary Table 4 gives a detailed overview of the results of each SNP calling round.

#### **References:**

- DePristo MA, Banks E, Poplin R, Garimella KV, Maguire JR, Hartl C, Philippakis AA, del Angel G, Rivas MA, Hanna M, et al. 2011. A framework for variation discovery and genotyping using next-generation DNA sequencing data. *Nature Genetics* 43:491-498.
- Koboldt DC, Zhang QY, Larson DE, Shen D, McLellan MD, Lin L, Miller CA, Mardis ER, Ding L, Wilson RK. 2012. VarScan 2: Somatic mutation and copy number alteration discovery in cancer by exome sequencing. *Genome Research* 22:568-576.
- Li H, Durbin R. 2009. Fast and accurate short read alignment with Burrows-Wheeler transform. *Bioinformatics* 25:1754-1760.
- Li H, Handsaker B, Wysoker A, Fennell T, Ruan J, Homer N, Marth G, Abecasis G, Durbin R, Proc GPD. 2009. The Sequence Alignment/Map format and SAMtools. *Bioinformatics* 25:2078-2079.
- Li H, Ruan J, Durbin R. 2008. Mapping short DNA sequencing reads and calling variants using mapping quality scores. *Genome Research* 18:1851-1858.
- McKenna A, Hanna M, Banks E, Sivachenko A, Cibulskis K, Kernytzky A, Garimella K, Altshuler D, Gabriel S, Daly M, et al. 2010. The Genome Analysis Toolkit: A MapReduce framework for analyzing next-generation DNA sequencing data. *Genome Research* 20:1297-1303.
- Trapnell C, Pachter L, Salzberg SL. 2009. TopHat: discovering splice junctions with RNA-Seq. *Bioinformatics* 25:1105-1111.
